# Supplementary material for: Highly enantioselective synthesis of tertiary alcohols: C2-symmetric N,N′-dioxide-Sc(iii) complex promoted direct aldol reaction of α-ketoesters and diazoacetate esters
Source: Royal Society of Chemistry journal article supplement (doi:10.1039/b913520k), 2009-01-01
Supplement: b913520k.pdf [file b913520k.pdf]

## Supporting information

# Highly Enantioselective Synthesis of Tertiary Alcohols: $C_2$ -Symmetric $N,N'$ -Dioxide-Sc(III) Complex Promoted Direct Aldol Reaction of $\alpha$ -Ketoesters and Diazo Diazoacetate Esters

Fei Wang, Xiaohua Liu, Yulong Zhang, Lili Lin, and Xiaoming Feng\*

*Key Laboratory of Green Chemistry & Technology,*

*Ministry of Education, College of Chemistry, Sichuan University, Chengdu*

*610064, China.*

|                                                                                                         |     |
|---------------------------------------------------------------------------------------------------------|-----|
| 1. General.....                                                                                         | S2  |
| 2. General procedure for chiral $N,N'$ -dioxides preparation.....                                       | S2  |
| 3. General procedure for asymmetric Aldol reaction of $\alpha$ -ketoesters and diazoacetate esters..... | S2  |
| 4. Optimization of conditions.....                                                                      | S3  |
| 5. The analytical and spectral characterization data of Aldol reaction products.....                    | S5  |
| 6. Copy of $^1\text{H}$ NMR and $^{13}\text{C}$ NMR spectra for some products.....                      | S20 |
| 7. References.....                                                                                      | S40 |

## 1. General

<sup>1</sup>H NMR spectra were recorded on commercial instruments (400 MHz). Chemical shifts were reported in ppm from tetramethylsilane with the solvent resonance as the internal standard (CDCl<sub>3</sub>, δ = 7.26). Data are reported as follows: chemical shift (δ ppm), multiplicity (s = singlet, d = doublet, t = triplet, m = multiplet), coupling constants (Hz), integration, and assignment. <sup>13</sup>C NMR data were collected on commercial instruments (100 MHz) with complete proton decoupling. Chemical shifts are reported in ppm from the tetramethylsilane with the solvent resonance as internal standard (CDCl<sub>3</sub>, δ = 77.0). The enantiomeric excesses were determined by HPLC analysis on Daicel Chiralcel AD or AD-H column at 254 nm in comparison with the authentic racemates. Optical rotations were measured on a Rudolph Research analytical with a sodium lamp and are reported as follows: [α]<sub>D</sub><sup>T</sup> (c = g/100 mL, solvent).

Commercial grade reagents were used without further purification. All reactions were carried out under nitrogen atmosphere and monitored by thin-layer chromatography. α-Ketoesters have been prepared in various methods, such as addition of Grignard reagents to oxalates,<sup>1</sup> Friedel-Crafts reaction.<sup>2</sup>

## 2. General procedure for chiral *N,N'*-dioxides preparation

The *N,N'*-dioxide ligand **L1-L4**, **L6-L7** were synthesized by the same procedure in the literature.<sup>3</sup>

## 3. General procedure for the Aldol Reaction of α-Ketoesters and Diazoacetate Esters

The mixture of ligand **L4** (10.0 mg, 0.015 mmol), Sc(OTf)<sub>3</sub> (4.9 mg, 0.010 mmol) in CH<sub>2</sub>Cl<sub>2</sub> (0.2 mL) was stirred at 30 °C for 30 min under nitrogen atmosphere. Then α-ketoester **1** (15 μ L, 0.1 mmol) and diazoacetate esters **2** (22 μ L, 0.2 mmol) were added sequentially under stirring. The reaction mixture was stirred at 30 °C for 72 h and directly purified by flash chromatography on silica gel (ethyl acetate : petroleum ether = 1:10) to obtain the corresponding tertiary alcohols.

## 4. Optimization of the conditions

**Table 1. Screening of metals and solvents.<sup>a</sup>**

| entry | metal                | solvent                              | yield (%) <sup>b</sup> | ee (%) <sup>c</sup> |
|-------|----------------------|--------------------------------------|------------------------|---------------------|
| 1     | In(OTf) <sub>3</sub> | CH <sub>2</sub> Cl <sub>2</sub>      | trace                  | -                   |
| 2     | La(OTf) <sub>3</sub> | CH <sub>2</sub> Cl <sub>2</sub>      | trace                  | -                   |
| 3     | Yb(OTf) <sub>3</sub> | CH <sub>2</sub> Cl <sub>2</sub>      | trace                  | -                   |
| 4     | Zn(OTf) <sub>3</sub> | CH <sub>2</sub> Cl <sub>2</sub>      | trace                  | -                   |
| 5     | Sc(OTf) <sub>3</sub> | CH <sub>2</sub> Cl <sub>2</sub>      | 54                     | 92                  |
| 6     | Sc(OTf) <sub>3</sub> | toluene                              | 25                     | 45                  |
| 7     | Sc(OTf) <sub>3</sub> | THF                                  | trace                  | -                   |
| 8     | Sc(OTf) <sub>3</sub> | MeOH                                 | 15                     | 57                  |
| 9     | Sc(OTf) <sub>3</sub> | CHCl <sub>3</sub>                    | 46                     | 87                  |
| 10    | Sc(OTf) <sub>3</sub> | CH <sub>2</sub> ClCH <sub>2</sub> Cl | 50                     | 90                  |

<sup>a</sup> Reactions were carried out with  $\alpha$ -ketoesters (0.1 mmol) and ethyl diazoacetate (0.2 mmol) in solvent (1.0 mL) at 30 °C for 48 h. <sup>b</sup> Isolated yield. <sup>c</sup> Determined by chiral HPLC.

**Table 2. Optimization of the ratio of ligand to metal and the reaction concentration.<sup>a</sup>**

| entry | Ratio of ligand/metal | Reaction concentration | yield (%) <sup>b</sup> | ee (%) <sup>c</sup> |
|-------|-----------------------|------------------------|------------------------|---------------------|
| 1     | 2:1                   | 0.1 M                  | 35                     | 93                  |
| 2     | 1.5:1                 | 0.1 M                  | 60                     | 92                  |
| 3     | 1:1                   | 0.1 M                  | 54                     | 92                  |
| 4     | 1:1.5                 | 0.1 M                  | 40                     | 91                  |

|   |     |       |    |    |
|---|-----|-------|----|----|
| 5 | 1:2 | 0.1 M | 36 | 90 |
| 6 | 1:1 | 0.5 M | 70 | 93 |
| 7 | 1:1 | 0.2 M | 56 | 92 |
| 8 | 1:1 | 0.5 M | 76 | 93 |

<sup>a</sup> Reactions were carried out with  $\alpha$ -ketoesters (0.1 mmol) and ethyl diazoacetate (0.2 mmol) in  $\text{CH}_2\text{Cl}_2$  at 30 °C for 48 h. <sup>b</sup> Isolated yield. <sup>c</sup> Determined by chiral HPLC.

**Table 3. Optimization of the reaction in DCE and  $\text{CHCl}_3$  using various catalyst loadings at 40 °C.**<sup>a</sup>

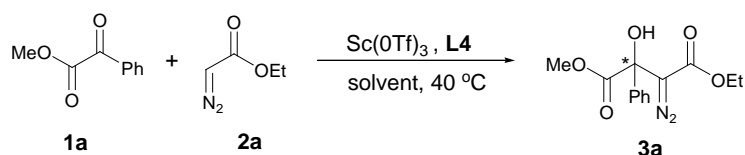

| entry | Catalyst loading | solvent         | yield (%) <sup>b</sup> | ee (%) <sup>c</sup> |
|-------|------------------|-----------------|------------------------|---------------------|
| 1     | 10               | DCE             | 62                     | 90                  |
| 2     | 10               | $\text{CHCl}_3$ | 60                     | 90                  |
| 3     | 5                | DCE             | 60                     | 89                  |
| 4     | 5                | $\text{CHCl}_3$ | 56                     | 88                  |

<sup>a</sup> Reactions were carried out with  $\alpha$ -ketoesters (0.1 mmol) and ethyl diazoacetate (0.2 mmol) in solvent (0.1 mL) at 40 °C for 72 h. The ratio of ligand/metal was 1.5:1. <sup>b</sup> Isolated yield. <sup>c</sup> Determined by chiral HPLC.

**Table 4. Optimization of the ratio between  $\alpha$ -ketoester and ethyl diazoacetate.**<sup>a</sup>

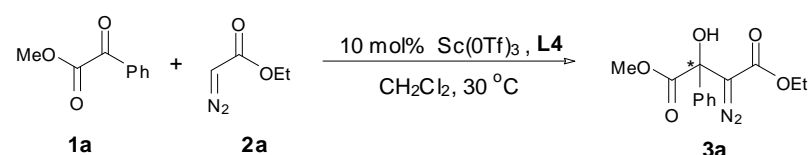

| entry | ethyl diazoacetate / $\alpha$ -ketoesters | yield (%) <sup>b</sup> | ee (%) <sup>c</sup> |
|-------|-------------------------------------------|------------------------|---------------------|
| 1     | 1                                         | 70                     | 89                  |
| 2     | 1.5                                       | 72                     | 90                  |
| 3     | 2                                         | 76                     | 93                  |

<sup>a</sup> Reactions were carried out with  $\alpha$ -ketoesters (0.1 mmol) and various equiv of ethyl

diazoacetate in 0.1 mL CH<sub>2</sub>Cl<sub>2</sub> at 30 °C for 72 h. The ratio of ligand/metal was 1.5:1..<sup>b</sup> Isolated yield. <sup>c</sup> Determined by chiral HPLC.

## 5. The analytical and spectral characterization data of direct Aldol reaction products

### 4-ethyl 1-methyl 3-diazo-2-hydroxy-2-phenylsuccinate

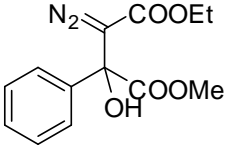 (C<sub>13</sub>H<sub>14</sub>N<sub>2</sub>O<sub>5</sub>) a yellow viscous liquid; 76% yield, 93% *ee*, [α]<sub>D</sub><sup>27</sup> = +161.7 (c = 0.24 in CH<sub>2</sub>Cl<sub>2</sub>); HPLC DAICEL CHIRALCEL AD, 2-propanol/n-hexane = 20/80, flow rate = 1.0 mL/min, λ = 254 nm, retention time: 6.5 min (major) and 11.2 min (minor); <sup>1</sup>H NMR (400 MHz, CDCl<sub>3</sub>) 1.27 (t, *J* = 7.0 Hz, 3H), 3.79 (s, 3H), 4.17-4.29 (m, 2H), 4.52 (s, 1H), 7.31-7.34 (m, 3H), 7.35-7.36 (m, 2H) ppm; <sup>13</sup>C NMR (100 MHz, CDCl<sub>3</sub>) 13.3, 52.5, 60.2, 71.8, 125.3, 127.6, 128.0, 135.2, 164.7, 171.6 ppm; HRMS (ESI-TOF) calcd for C<sub>13</sub>H<sub>14</sub>N<sub>2</sub>O<sub>5</sub> ([M+Na<sup>+</sup>]) = 301.0800, Found 301.0800.

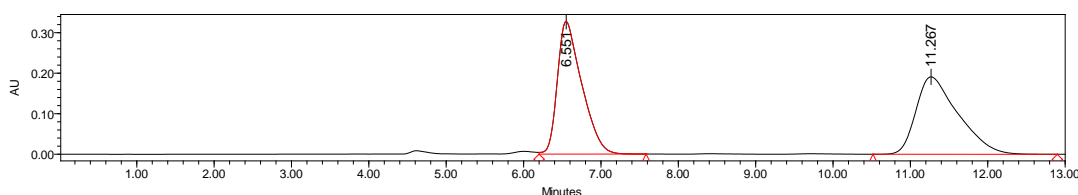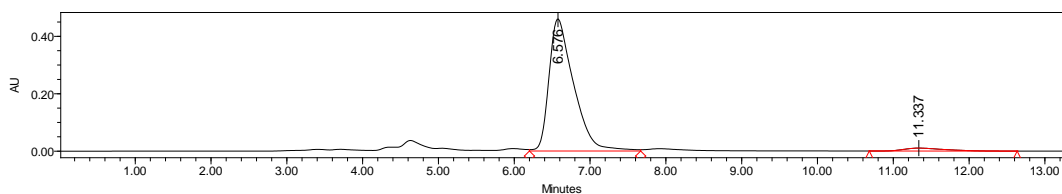

### dimethyl 3-diazo-2-hydroxy-2-phenylsuccinate

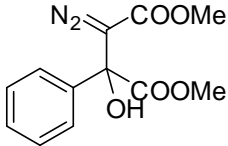 ( $C_{12}H_{12}N_2O_5$ ) a yellow solid; 78% yield, 95% *ee*,  
 $[\alpha]_D^{27} = +76.0$  ( $c = 0.20$  in  $CH_2Cl_2$ ); HPLC DAICEL  
CHIRALCEL AD, 2-propanol/n-hexane = 20/80, flow rate = 1.0 mL/min,  
 $\lambda = 254$  nm, retention time: 6.2 min (major) and 9.7 min (minor);  $^1H$   
NMR (400 MHz,  $CDCl_3$ ) 3.76-3.83 (m, 6H), 4.52 (s, 1H), 7.36-7.43 (m,  
3H), 7.68-7.71 (m, 2H) ppm;  $^{13}C$  NMR (100 MHz,  $CDCl_3$ ) 51.4, 53.0,  
75.6, 125.3, 127.6, 128.1, 135.1, 165.0, 171.5 ppm; HRMS (ESI-TOF)  
calcd for  $C_{12}H_{12}N_2O_5$  ( $[M+Na]^+$ ) = 287.0644, Found 287.0643.

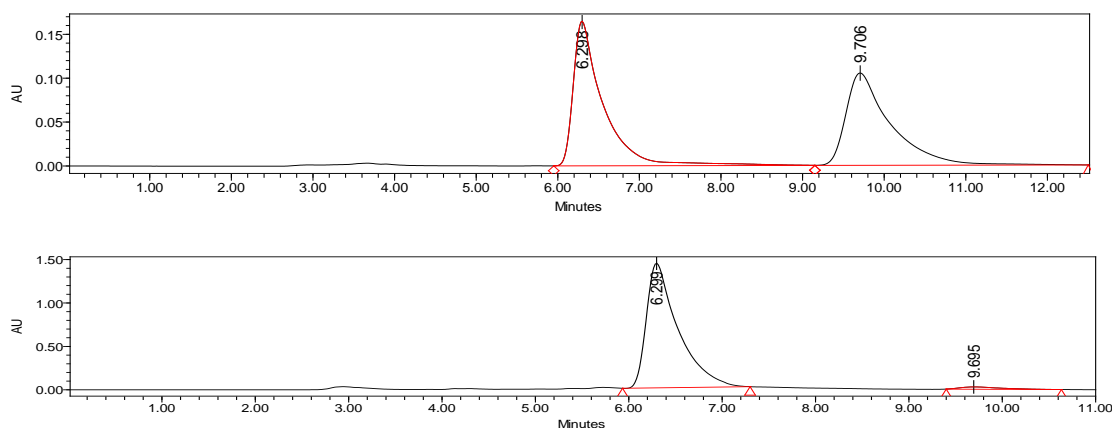

#### 4-ethyl 1-methyl 3-diazo-2-hydroxy-2-*m*-tolylsuccinate

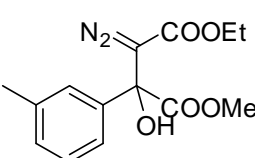 ( $C_{14}H_{16}N_2O_5$ ) a yellow viscous liquid; 68% yield,  
96% *ee*,  $[\alpha]_D^{27} = +160.0$  ( $c = 0.20$  in  $CH_2Cl_2$ );  
HPLC DAICEL CHIRALCEL AD,  
2-propanol/n-hexane = 20/80, flow rate = 1.0 mL/min,  $\lambda = 254$  nm,  
retention time: 5.8 min (major) and 9.9 min (minor);  $^1H$  NMR (400 MHz,  
 $CDCl_3$ ) 1.27-1.31 (t,  $J = 7.0$  Hz, 3H), 2.17 (s, 3H), 3.82 (s, 3H), 4.40-4.46  
(m, 2H), 4.50 (s, 1H), 7.15-7.45 (m, 4H) ppm;  $^{13}C$  NMR (100 MHz,  
 $CDCl_3$ ) 13.3, 20.5, 29.4, 52.9, 60.3, 122.2, 125.6, 127.6, 128.8, 135.1,

135.5, 164.8, 171.7 ppm; HRMS (ESI-TOF) calcd for  $C_{14}H_{16}N_2O_5$   
( $[M+Na^+]$ ) = 315.0957, Found 315.0967.

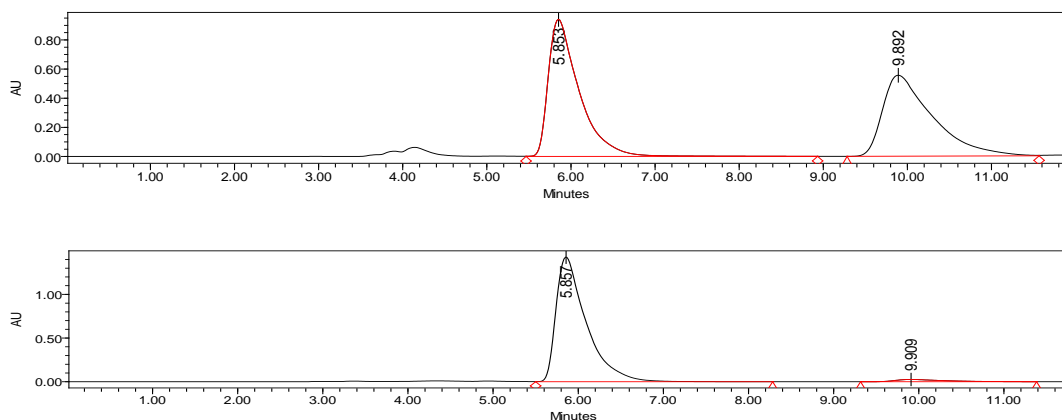

### dimethyl 3-diazo-2-hydroxy-2-*m*-tolylsuccinate

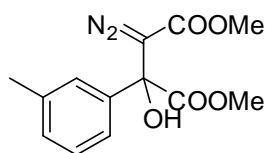

( $C_{13}H_{14}N_2O_5$ ) a yellow solid; 70% yield, 97% *ee*,

$[\alpha]_D^{27} = +231.5$  ( $c = 0.11$  in  $CH_2Cl_2$ ); HPLC

DAICEL CHIRALCEL AD, 2-propanol/*n*-hexane = 20/80, flow rate = 1.0 mL/min,  $\lambda = 254$  nm, retention time: 6.0 min (major) and 9.3 min (minor);  $^1H$  NMR (400 MHz,  $CDCl_3$ ) 2.37 (s, 3H), 3.80-3.82 (m, 3H), 4.20-4.30 (m, 3H), 4.50 (s, 1H), 7.15-7.45 (m, 4H) ppm;  $^{13}C$  NMR (100 MHz,  $CDCl_3$ ) 13.2, 20.4, 52.6, 60.2, 122.3, 125.6, 127.6, 128.8, 135.0, 137.5, 165.1, 171.6 ppm; HRMS (ESI-TOF) calcd for  $C_{13}H_{14}N_2O_5$  ( $[M+Na^+]$ ) = 301.0800, Found 301.0797.

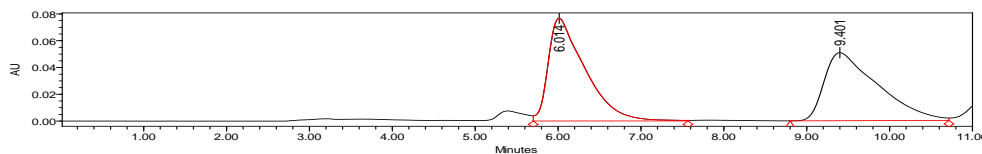

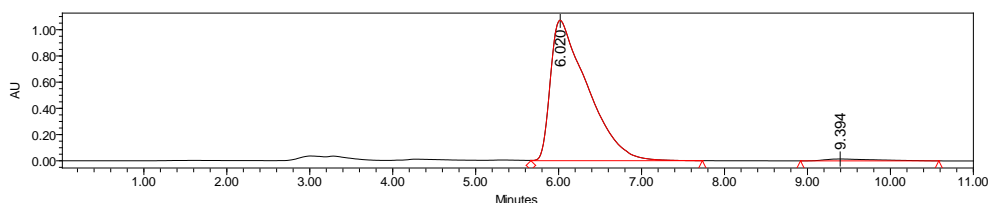

#### 4-ethyl 1-methyl 3-diazo-2-hydroxy-2-p-tolylsuccinate

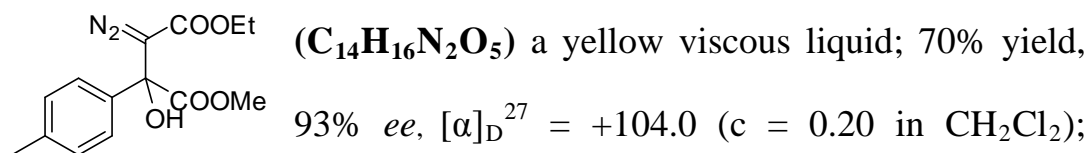

HPLC DAICEL CHIRALCEL AD, 2-propanol/n-hexane = 20/80, flow rate = 1.0 mL/min,  $\lambda = 254$  nm, retention time: 6.4 min (major) and 9.9 min (minor);  $^1H$  NMR (400 MHz,  $CDCl_3$ ) 1.27-1.31 (t,  $J = 7.2$  Hz, 3H), 2.35 (s, 3H), 3.81 (s, 3H), 4.48 (s, 1H), 7.19-7.21 (m, 4H), 7.56-7.58 (m, 2H) ppm;  $^{13}C$  NMR (100 MHz,  $CDCl_3$ ) 14.3, 21.0, 30.9, 53.9, 61.3, 77.34, 126.1, 129.4, 139.0, 165.8, 171.2 ppm; HRMS (ESI-TOF) calcd for  $C_{14}H_{16}N_2O_5$  ( $[M+Na^+]$ ) = 315.0957, Found 315.0958.

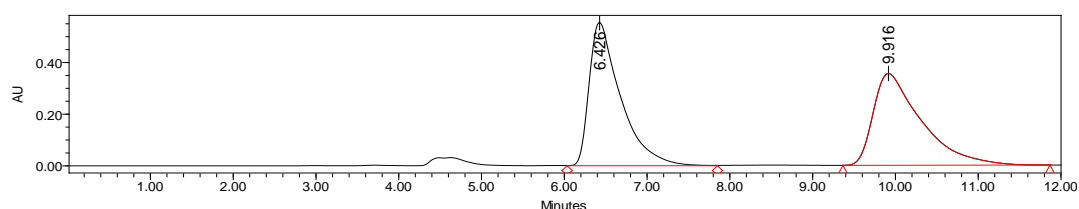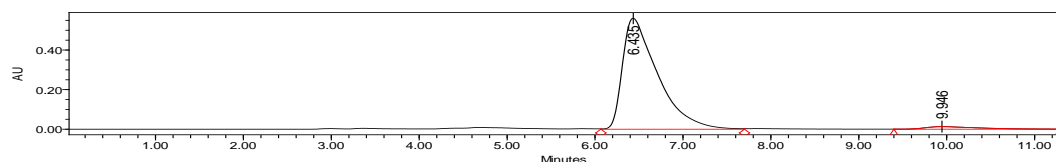

#### dimethyl 3-diazo-2-hydroxy-2-p-tolylsuccinate

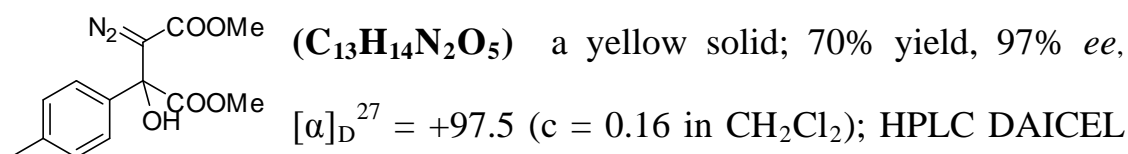



CHIRALCEL AD, 2-propanol/n-hexane = 20/80, flow rate = 1.0 mL/min,  $\lambda = 254$  nm, retention time: 6.7 min (major) and 9.7 min (minor);  $^1\text{H}$  NMR (400 MHz,  $\text{CDCl}_3$ ) 2.35 (s, 3H), 3.80 (s, 3H), 3.82 (s, 3H), 4.48 (s, 1H), 7.19-7.21 (m, 2H), 7.55-7.57 (m, 2H) ppm;  $^{13}\text{C}$  NMR (100 MHz,  $\text{CDCl}_3$ ) 20.0, 51.1, 60.2, 76.2, 125.0, 127.0, 132.2, 138.0, 165.1, 171.7 ppm; HRMS (ESI-TOF) calcd for  $\text{C}_{13}\text{H}_{14}\text{N}_2\text{O}_5$  ( $[\text{M}+\text{Na}^+]$ ) = 301.0800, Found 301.0799.

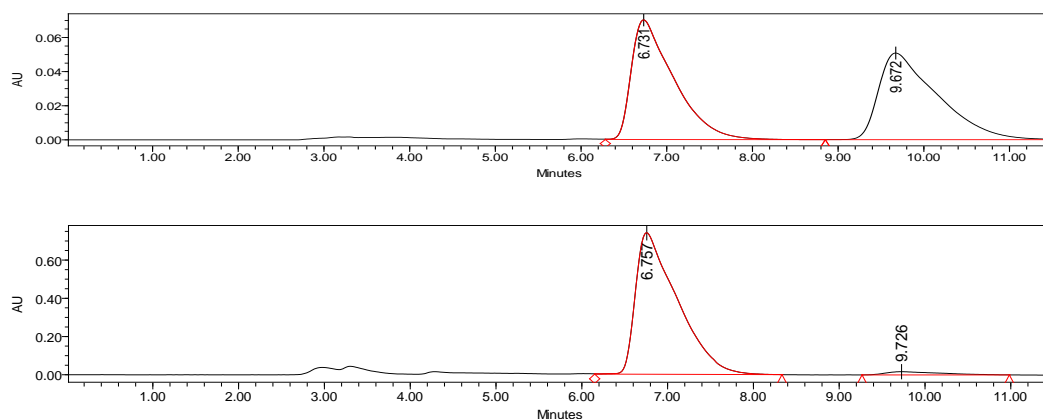

#### 4-ethyl 1-methyl 3-diazo-2-hydroxy-2-(4-methoxyphenyl)succinate

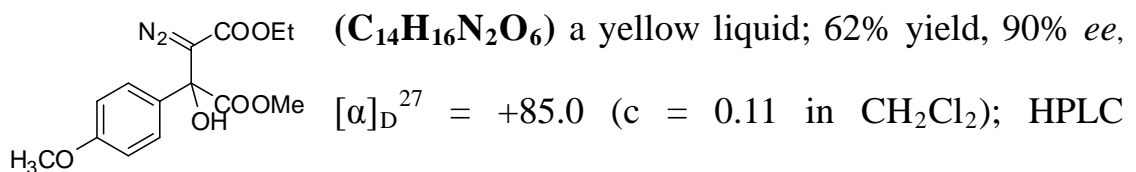

DAICEL CHIRALCEL AD, 2-propanol/n-hexane = 20/80, flow rate = 1.0 mL/min,  $\lambda = 254$  nm, retention time: 8.7 min (major) and 12.8 min (minor);  $^1\text{H}$  NMR (400 MHz,  $\text{CDCl}_3$ ) 1.26-1.30 (t,  $J = 7.4$  Hz, 3H), 3.81 (s, 3H), 3.82 (s, 3H), 4.24-4.48 (s, 2H), 6.90-6.92 (m, 2H), 7.60-7.62 (m, 2H) ppm;  $^{13}\text{C}$  NMR (100 MHz,  $\text{CDCl}_3$ ) 14.2, 22.7, 29.5, 31.9, 53.3, 61.3, 114.0, 127.5, 128.1, 160.1, 165.8, 171.9 ppm.

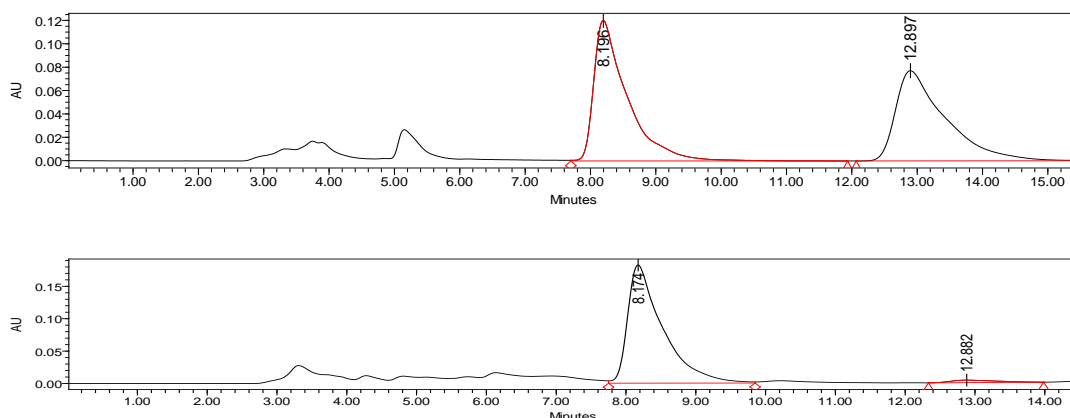

### dimethyl 3-diazo-2-hydroxy-2-(4-methoxyphenyl)succinate

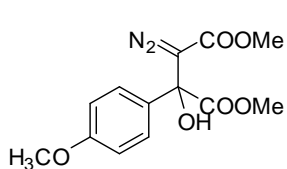 (C<sub>13</sub>H<sub>14</sub>N<sub>2</sub>O<sub>6</sub>) a yellow solid; 68% yield, 91% *ee*,  
[α]<sub>D</sub><sup>27</sup> = +120.0 (c = 0.12 in CH<sub>2</sub>Cl<sub>2</sub>); HPLC  
DAICEL CHIRALCEL AD, 2-propanol/n-hexane =  
20/80, flow rate = 1.0 mL/min, λ = 254 nm, retention time: 8.5 min  
(major) and 12.4 min (minor); <sup>1</sup>H NMR (400 MHz, CDCl<sub>3</sub>) 3.79 (s, 3H),  
3.80 (s, 3H), 4.46(s, 1H), 6.89-6.92 (m, 2H), 7.58-7.60 (m, 2H) ppm; <sup>13</sup>C  
NMR (100 MHz, CDCl<sub>3</sub>) 22.7, 29.6, 31.9, 54.1, 55.2, 114.1, 127.5, 160.1,  
166.1, 172.8 ppm.

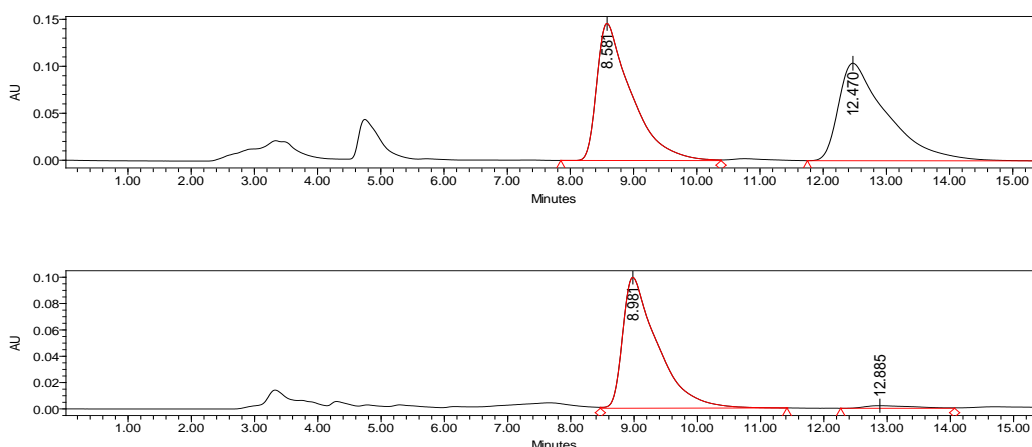

### 4-ethyl 1-methyl 3-diazo-2-(3-fluorophenyl)-2-hydroxysuccinate

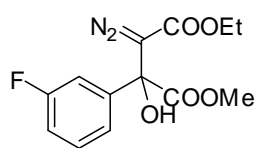

( $C_{13}H_{13}FN_2O_5$ ) a yellow liquid; 62% yield, 94% *ee*,

$[\alpha]_D^{27} = +450.0$  ( $c = 0.10$  in  $CH_2Cl_2$ ); HPLC DAICEL

CHIRALCEL AD, 2-propanol/n-hexane = 20/80, flow

rate = 1.0 mL/min,  $\lambda = 254$  nm, retention time: 5.9 min (major) and 10.4

min (minor);  $^1H$  NMR (400 MHz,  $CDCl_3$ ) 1.27-1.31 (t,  $J = 7.0$  Hz, 3H),

3.84 (s, 3H), 4.22-4.29 (m, 2H), 4.56 (s, 1H), 7.35-7.39 (m, 2H),

7.40-7.45 (m, 2H) ppm;  $^{13}C$  NMR (100 MHz,  $CDCl_3$ ) 14.1, 53.2, 60.3,

76.2, 112.6, 115.1, 120.9, 137.8, 160.6, 164.8, 171.0 ppm; HRMS

(ESI-TOF) calcd for  $C_{13}H_{13}FN_2O_5$  ( $[M+Na^+]$ ) = 319.0706, Found

319.0699.

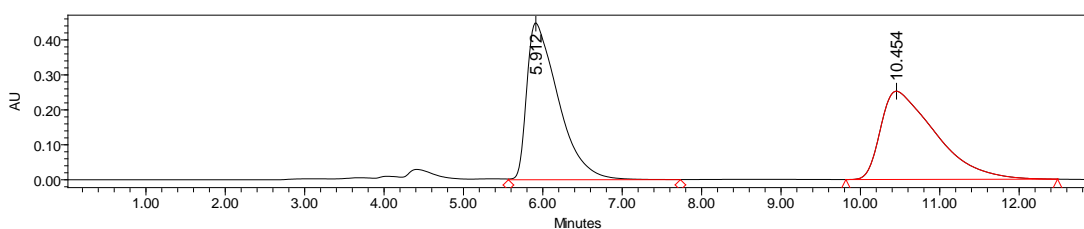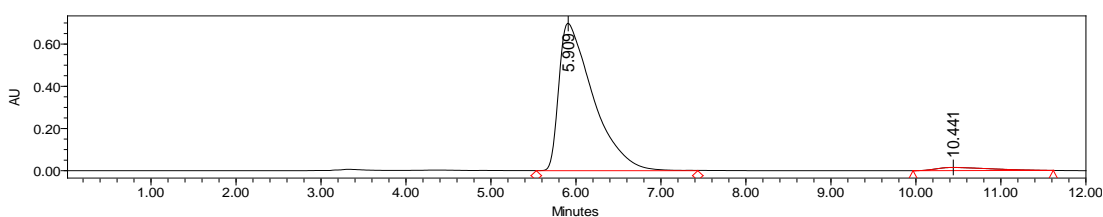

### dimethyl 3-diazo-2-(3-fluorophenyl)-2-hydroxysuccinate

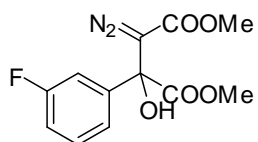

( $C_{12}H_{11}FN_2O_5$ ) a yellow solid; 75% yield, 95% *ee*,

$[\alpha]_D^{27} = +166.9$  ( $c = 0.32$  in  $CH_2Cl_2$ ); HPLC DAICEL

CHIRALCEL AD, 2-propanol/n-hexane = 20/80, flow rate = 1.0 mL/min,

$\lambda = 254$  nm, retention time: 6.2 min (major) and 9.9 min (minor);  $^1H$

NMR (400 MHz,  $CDCl_3$ ) 3.81 (s, 3H), 3.84 (s, 3H), 4.56 (s, 1H),

7.35-7.45 (m, 4H) ppm;  $^{13}\text{C}$  NMR (100 MHz,  $\text{CDCl}_3$ ) 51.2, 53.1, 76.2, 112.6, 115.1, 120.9, 129.2, 137.8, 160.4, 164.8, 171.0 ppm; HRMS (ESI-TOF) calcd for  $\text{C}_{12}\text{H}_{11}\text{FN}_2\text{O}_5$  ( $[\text{M}+\text{Na}^+]$ ) = 315.0550, Found 315.0548.

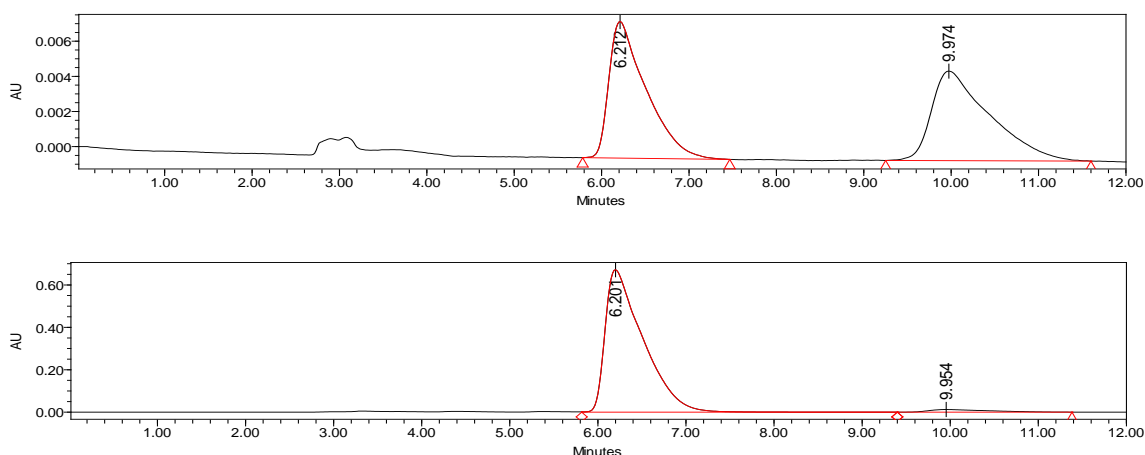

#### 4-ethyl 1-methyl 3-diazo-2-(4-fluorophenyl)-2-hydroxysuccinate

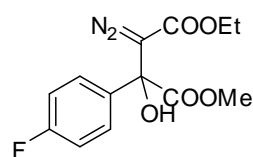

( $\text{C}_{13}\text{H}_{13}\text{FN}_2\text{O}_5$ ) a yellow liquid; 66% yield, 93% *ee*,  
 $[\alpha]_{\text{D}}^{27} = +125.0$  ( $c = 0.20$  in  $\text{CH}_2\text{Cl}_2$ ); HPLC DAICEL

CHIRALCEL AD, 2-propanol/n-hexane = 20/80, flow rate = 1.0 mL/min,  
 $\lambda = 254$  nm, retention time: 5.6 min (major) and 8.4 min (minor);  $^1\text{H}$   
NMR (400 MHz,  $\text{CDCl}_3$ ) 1.27-1.31 (t,  $J = 7.2$  Hz, 3H), 3.83 (s, 3H),  
4.24-4.30 (m, 2H), 4.54 (s, 1H), 7.07-7.11 (m, 2H), 7.68-7.69 (m, 2H)  
ppm;  $^{13}\text{C}$  NMR (100 MHz,  $\text{CDCl}_3$ ) 13.3, 28.6, 53.0, 60.3, 114.6, 127.2,  
130.9, 160.6, 164.5, 171.4 ppm; HRMS (ESI-TOF) calcd for  
 $\text{C}_{13}\text{H}_{13}\text{FN}_2\text{O}_5$  ( $[\text{M}+\text{Na}^+]$ ) = 319.0706, Found 319.0706.

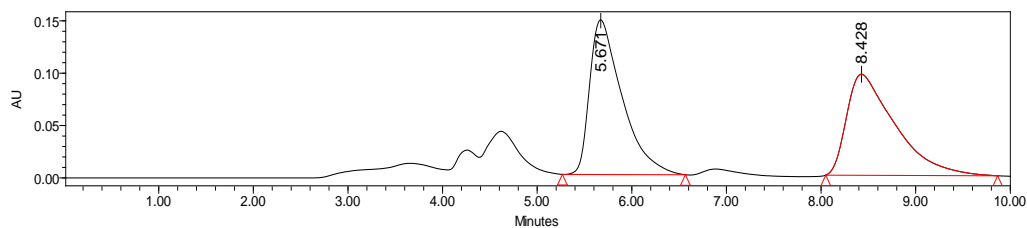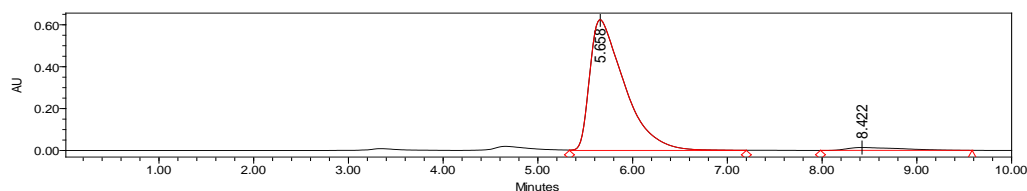

### dimethyl 3-diazo-2-(4-fluorophenyl)-2-hydroxysuccinate

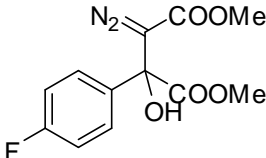 ( $C_{12}H_{11}FN_2O_5$ ) a yellow solid; 67% yield, 95% *ee*,  
[ $\alpha$ ]<sub>D</sub><sup>27</sup> = +76.7 (c = 0.24 in  $CH_2Cl_2$ ); HPLC DAICEL  
CHIRALCEL AD, 2-propanol/n-hexane = 20/80, flow  
rate = 1.0 mL/min,  $\lambda$  = 254 nm, retention time: 5.9 min (major) and 8.0  
min (minor); <sup>1</sup>H NMR (400 MHz,  $CDCl_3$ ) 3.81 (s, 3H), 3.83 (s, 3H), 4.54  
(s, 1H), 7.07-7.11(m, 2H), 7.67-7.69 (m, 2H) ppm; <sup>13</sup>C NMR (100 MHz,  
 $CDCl_3$ ) 28.6, 52.1, 114.7, 127.2, 130.9, 160.8, 163.2, 164.9, 171.3 ppm;  
HRMS (ESI-TOF) calcd for  $C_{13}H_{14}N_2O_5$  ([M+Na<sup>+</sup>]) = 315.0550, Found  
315.0545.

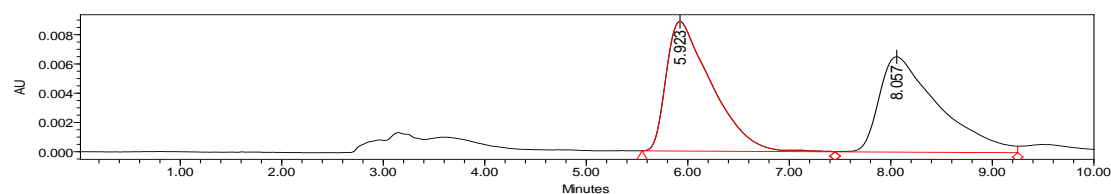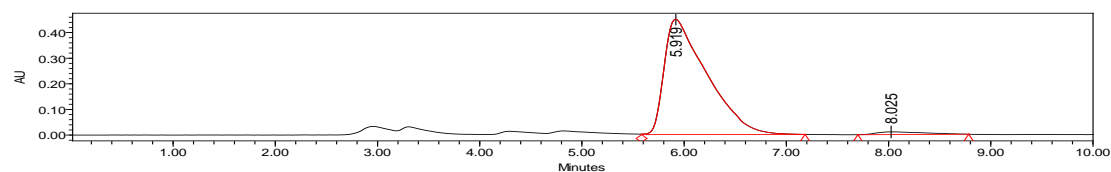

### 4-ethyl 1-methyl 2-(4-bromophenyl)-3-diazo-2-hydroxysuccinate

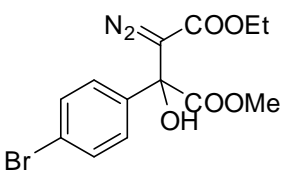 (C<sub>13</sub>H<sub>13</sub>BrN<sub>2</sub>O<sub>5</sub>) a yellow liquid; 66% yield, 94% *ee*,  $[\alpha]_D^{27} = +133.9$  (c = 0.36 in CH<sub>2</sub>Cl<sub>2</sub>); HPLC DAICEL CHIRALCEL AD, 2-propanol/n-hexane = 20/80, flow rate = 1.0 mL/min,  $\lambda = 254$  nm, retention time: 6.2 min (major) and 8.8 min (minor); <sup>1</sup>H NMR (400 MHz, CDCl<sub>3</sub>) 1.27-1.31 (t, *J* = 7.2 Hz, 3H), 3.82 (s, 3H), 4.22-4.31 (m, 2H), 4.53 (s, 1H), 7.52-7.54 (m, 2H), 7.58-7.60 (m, 2H) ppm; <sup>13</sup>C NMR (100 MHz, CDCl<sub>3</sub>) 14.3, 54.2, 61.4, 77.3, 123.6, 128.1, 131.9, 135.4, 165.5, 172.2 ppm; HRMS (ESI-TOF) calcd for C<sub>13</sub>H<sub>13</sub>BrN<sub>2</sub>O<sub>5</sub> ([M+Na<sup>+</sup>]) = 378.9906, Found 378.9902.

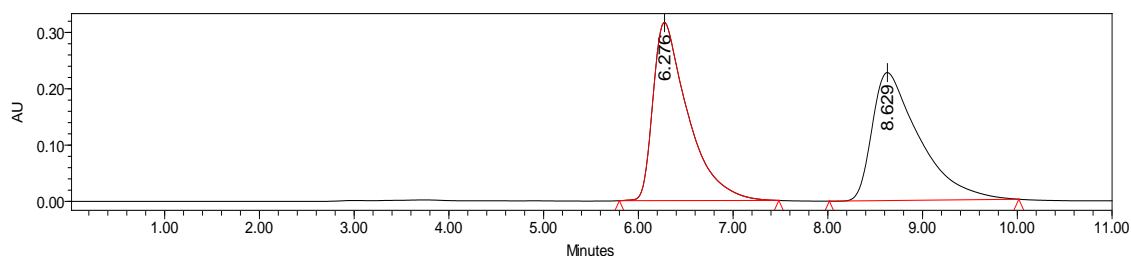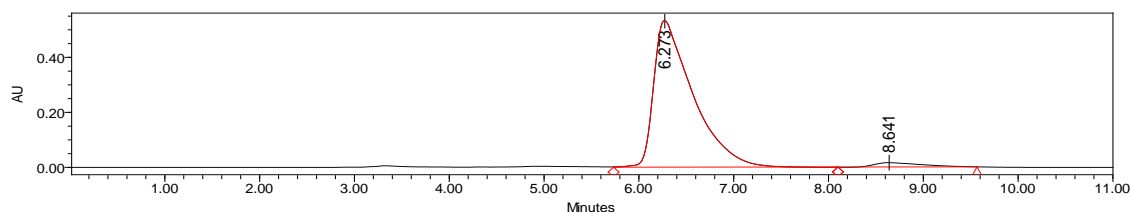

### dimethyl 2-(4-bromophenyl)-3-diazo-2-hydroxysuccinate

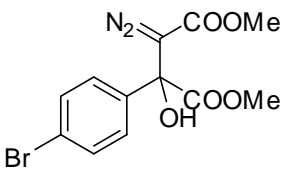 (C<sub>12</sub>H<sub>11</sub>BrN<sub>2</sub>O<sub>5</sub>) a yellow solid; 85% yield, 94% *ee*,  $[\alpha]_D^{27} = +120.8$  (c = 0.24 in CH<sub>2</sub>Cl<sub>2</sub>); HPLC DAICEL CHIRALCEL AD, 2-propanol/n-hexane =

20/80, flow rate = 1.0 mL/min,  $\lambda$  = 254 nm, retention time: 6.6 min (major) and 8.4 min (minor);  $^1\text{H}$  NMR (400 MHz,  $\text{CDCl}_3$ ) 3.76-3.83 (m, 6H), 4.52 (s, 1H), 7.36-7.43 (m, 3H), 7.68-7.71 (m, 2H) ppm;  $^{13}\text{C}$  NMR (100 MHz,  $\text{CDCl}_3$ ) 51.1, 53.0, 75.6, 114.7, 125.2, 127.6, 128.1, 165.0, 171.5 ppm; HRMS (ESI-TOF) calcd for  $\text{C}_{12}\text{H}_{11}\text{BrN}_2\text{O}_5$  ( $[\text{M}+\text{Na}^+]$ ) = 364.9749, Found 364.9745.

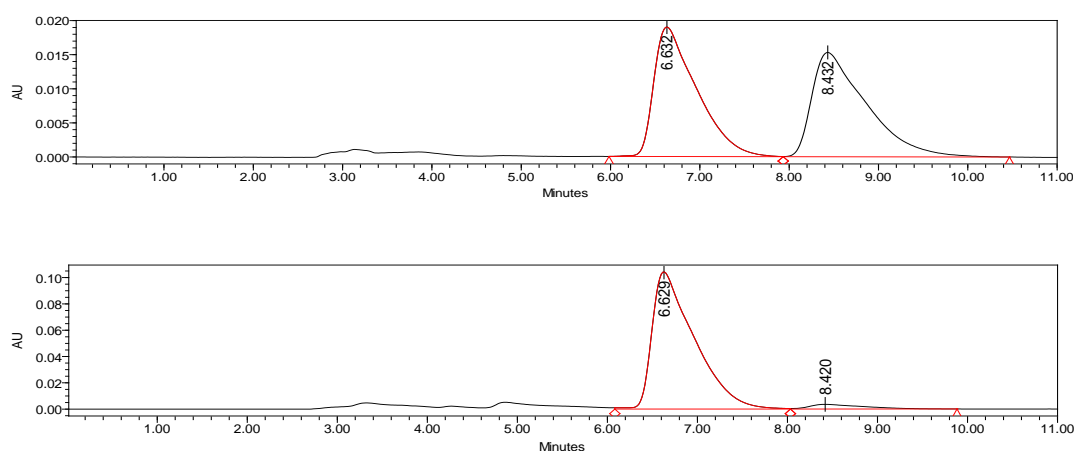

#### 4-ethyl 1-methyl 2-(4-chlorophenyl)-3-diazo-2-hydroxysuccinate

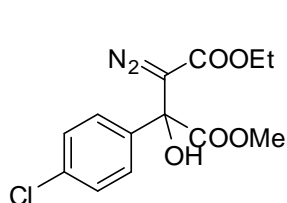

( $\text{C}_{13}\text{H}_{13}\text{ClN}_2\text{O}_5$ ) a yellow liquid; 82% yield, 95% *ee*,

$[\alpha]_{\text{D}}^{27} = +86.0$  ( $c = 0.30$  in  $\text{CH}_2\text{Cl}_2$ ); HPLC DAICEL

CHIRALCEL AD, 2-propanol/n-hexane = 20/80, flow

rate = 1.0 mL/min,  $\lambda$  = 254 nm, retention time: 5.4 min (major) and 7.6 min (minor);  $^1\text{H}$  NMR (400 MHz,  $\text{CDCl}_3$ ) 1.27-1.31 (t,  $J = 7.0$  Hz, 3H), 3.82 (s, 3H), 4.21-4.30 (m, 2H), 4.53 (s, 1H), 7.37-7.39 (m, 2H), 7.63-7.64 (m, 2H) ppm;  $^{13}\text{C}$  NMR (100 MHz,  $\text{CDCl}_3$ ) 13.3, 28.6, 53.2, 60.4, 126.8, 127.9, 133.8, 134.3, 164.5, 171.3 ppm; HRMS (ESI-TOF) calcd for  $\text{C}_{13}\text{H}_{13}\text{ClN}_2\text{O}_5$  ( $[\text{M}+\text{Na}^+]$ ) = 335.0411, Found 335.0409.

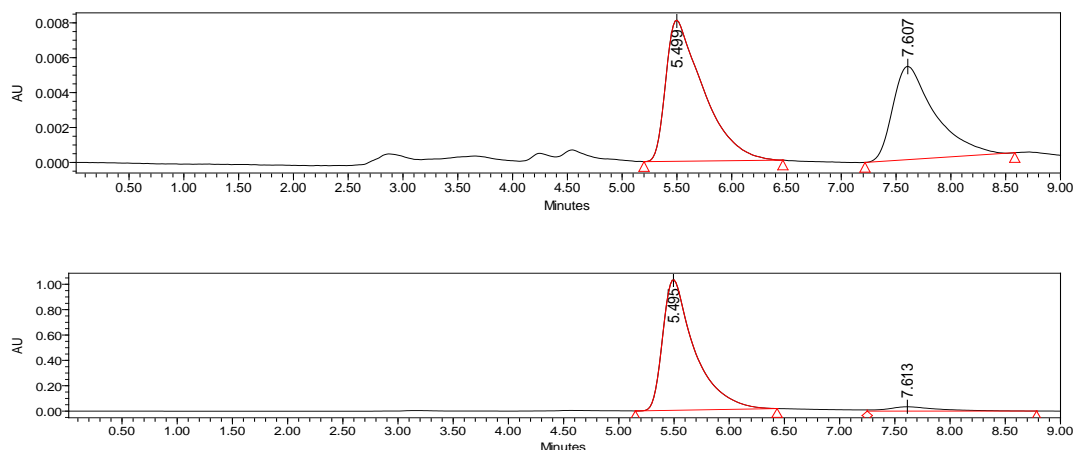

### dimethyl 2-(4-chlorophenyl)-3-diazo-2-hydroxysuccinate

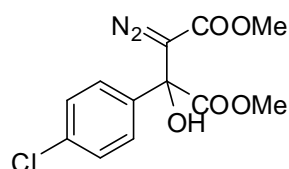

(C<sub>12</sub>H<sub>11</sub>ClN<sub>2</sub>O<sub>5</sub>) a yellow solid; 84% yield, 94% *ee*,

$[\alpha]_D^{27} = +125.0$  (*c* = 0.20 in CH<sub>2</sub>Cl<sub>2</sub>); HPLC

DAICEL CHIRALCEL AD, 2-propanol/n-hexane = 20/80, flow rate = 1.0

mL/min,  $\lambda = 254$  nm, retention time: 6.1 min (major) and 7.9 min

(minor); <sup>1</sup>H NMR (400 MHz, CDCl<sub>3</sub>) 3.81 (s, 3H), 3.83 (s, 3H), 4.53 (s,

1H), 7.37-7.39 (m, 2H), 7.64-7.66 (m, 2H) ppm; <sup>13</sup>C NMR (100 MHz,

CDCl<sub>3</sub>) 29.7, 52.2, 54.2, 127.8, 129.0, 128.1, 134.8, 135.3, 165.9, 172.2

ppm; HRMS (ESI-TOF) calcd for C<sub>12</sub>H<sub>11</sub>ClN<sub>2</sub>O<sub>5</sub> ([M+Na<sup>+</sup>]) = 321.0254,

Found 321.0247.

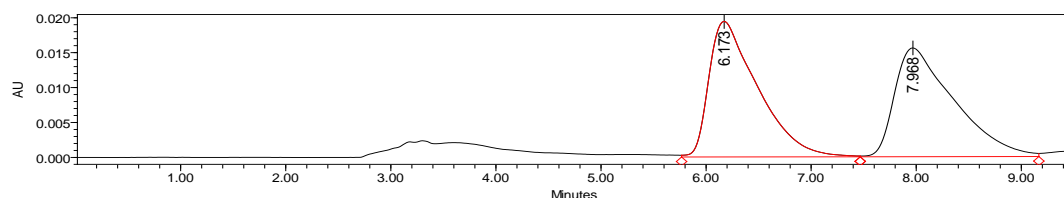



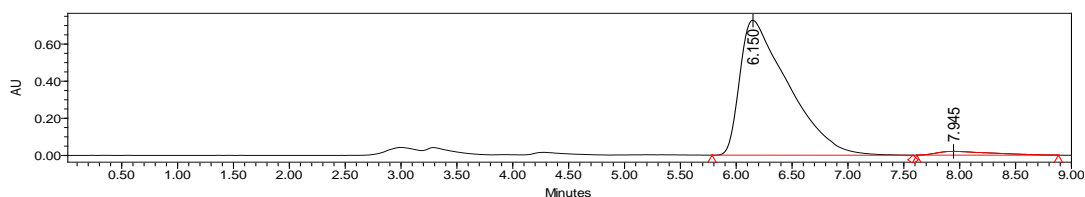

#### 4-ethyl 1-methyl 3-diazo-2-hydroxy-2-(naphthalen-2-yl)succinate

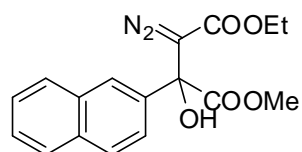

( $C_{17}H_{16}N_2O_5$ ) a yellow solid; 64% yield, 92% *ee*,

$[\alpha]_D^{27} = +142.0$  ( $c = 0.20$  in  $CH_2Cl_2$ ); HPLC

DAICEL CHIRALCEL AD, 2-propanol/n-hexane =

20/80, flow rate = 1.0 mL/min,  $\lambda = 254$  nm, retention time: 8.3 min

(major) and 11.9 min (minor);  $^1H$  NMR (400 MHz,  $CDCl_3$ ) 1.29-1.32 (t,  $J$

= 7.0 Hz, 3H), 3.82 (s, 3H), 3.82 (s, 3H), 3.83-4.31(m, 2H), 4.34 (s, 1H),

7.51-8.24 (m, 7H) ppm;  $^{13}C$  NMR (100 MHz,  $CDCl_3$ ) 14.7, 30.0, 54.4,

61.7, 123.8, 126.4, 126.8, 127.3, 127.8, 128.9, 129.0, 129.1, 133.4, 133.6,

165.1, 171.5 ppm.

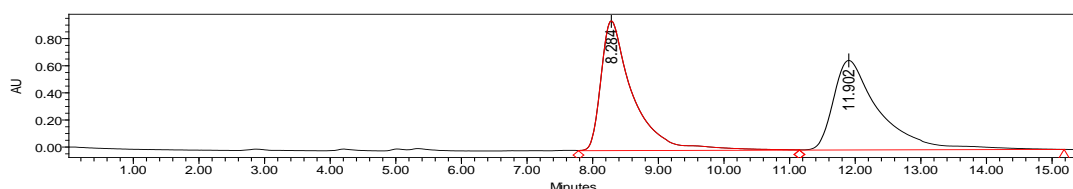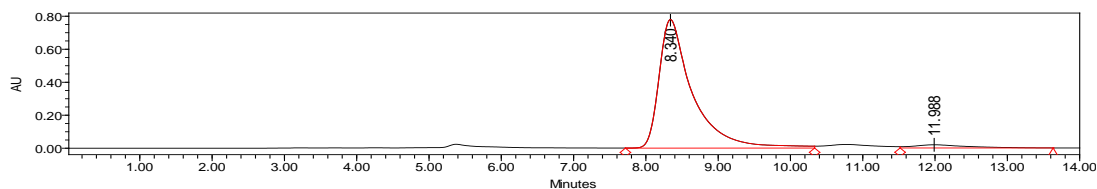

#### dimethyl 3-diazo-2-hydroxy-2-(naphthalen-2-yl)succinate

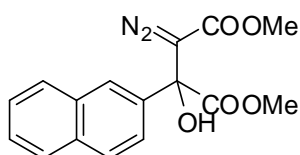

( $C_{16}H_{14}N_2O_5$ ) a yellow solid; 80% yield, 94% *ee*,

$[\alpha]_D^{27} = +35.0$  ( $c = 0.10$  in  $CH_2Cl_2$ ); HPLC DAICEL

CHIRALCEL AD, 2-propanol/n-hexane = 20/80, flow rate = 1.0 mL/min,  
 $\lambda = 254$  nm, retention time: 8.5 min (major) and 12.2 min (minor);  $^1\text{H}$   
NMR (400 MHz,  $\text{CDCl}_3$ ) 3.81 (s, 3H), 3.82 (s, 3H), 4.63 (s, 1H),  
7.49-7.74 (m, 7H) ppm;  $^{13}\text{C}$  NMR (100 MHz,  $\text{CDCl}_3$ ) 28.6, 51.2, 53.1,  
122.4, 125.1, 125.5, 125.9, 126.5, 127.6, 127.6, 128.1, 132.0, 132.3,  
165.1, 171.5 ppm; HRMS (ESI-TOF) calcd for  $\text{C}_{16}\text{H}_{14}\text{N}_2\text{O}_5$  ( $[\text{M}+\text{Na}^+]$ ) =  
321.0254, Found 321.0247.

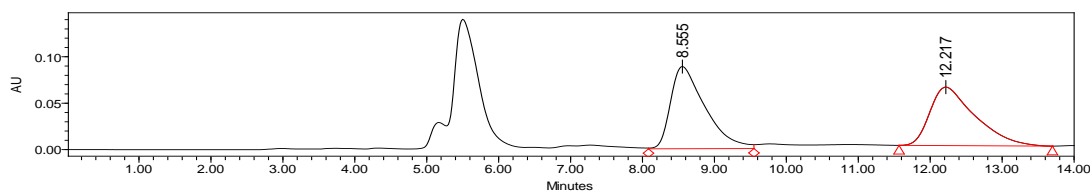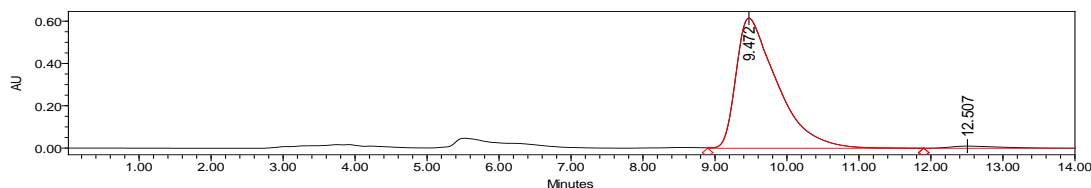

### dimethyl 3-diazo-2-hydroxy-2-(thiophen-2-yl)succinate

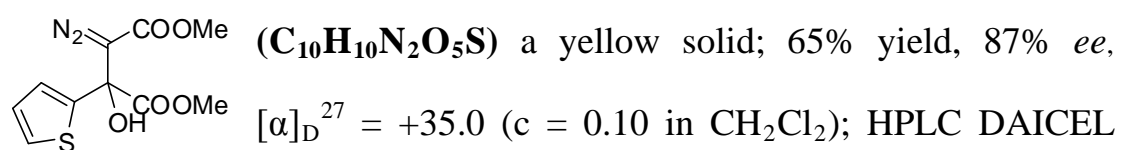

CHIRALCEL AD, 2-propanol/n-hexane = 20/80, flow rate = 1.0 mL/min,  
 $\lambda = 254$  nm, retention time: 7.4 min (major) and 11.2 min (minor);  $^1\text{H}$   
NMR (400 MHz,  $\text{CDCl}_3$ ) 3.81 (s, 3H), 3.82 (s, 3H), 4.63 (s, 1H),  
7.49-7.74 (m, 3H) ppm;  $^{13}\text{C}$  NMR (100 MHz,  $\text{CDCl}_3$ ) 51.2, 53.1, 65.3,  
126.5, 127.6, 127.6, 129.1, 165.1, 171.5 ppm.

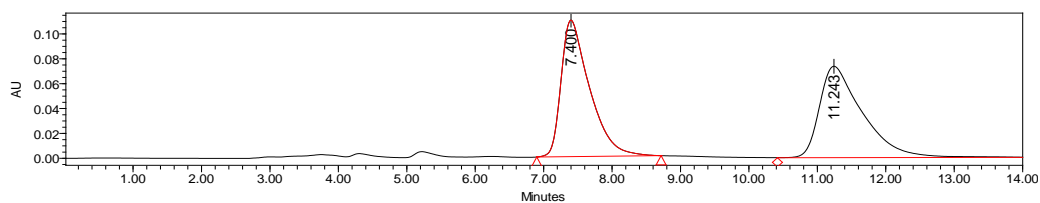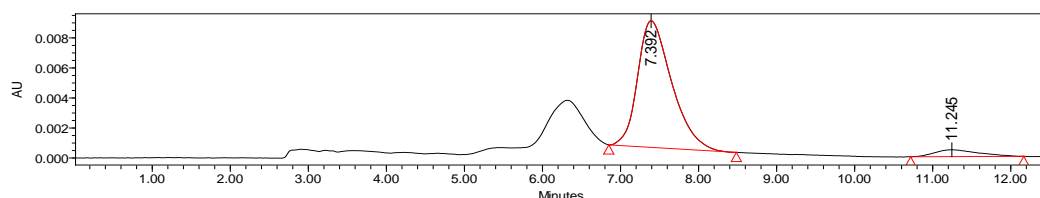

### dimethyl 2-cyclohexyl-3-diazo-2-hydroxysuccinate

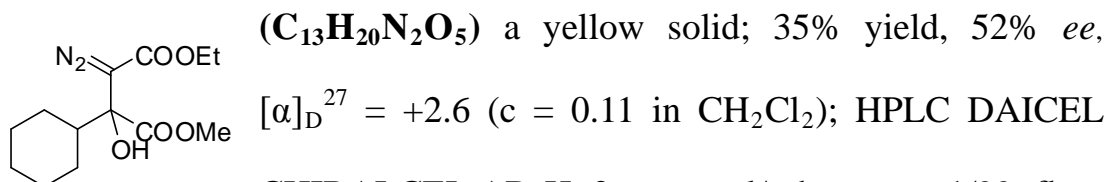

rate = 1.0 mL/min,  $\lambda$  = 254 nm, retention time: 15.3 min (major) and 20.0 min (minor); <sup>1</sup>H NMR (400 MHz, CDCl<sub>3</sub>) 1.25-1.28 (t, *J* = 7.0 Hz, 3H), 1.33-1.36 (m, 4H), 1.61-1.81 (m, 7H), 3.80 (s, 3H), 4.20-4.24 (m, 2H), 4.42 (s, 1H) ppm; <sup>13</sup>C NMR (100 MHz, CDCl<sub>3</sub>) 13.3, 24.9, 25.1, 25.6, 28.6, 41.7, 52.1, 60.1, 165.4, 173.0 ppm; HRMS (ESI-TOF) calcd for C<sub>13</sub>H<sub>20</sub>N<sub>2</sub>O<sub>5</sub> ([M+Na<sup>+</sup>]) = 307.1270, Found 307.1270.

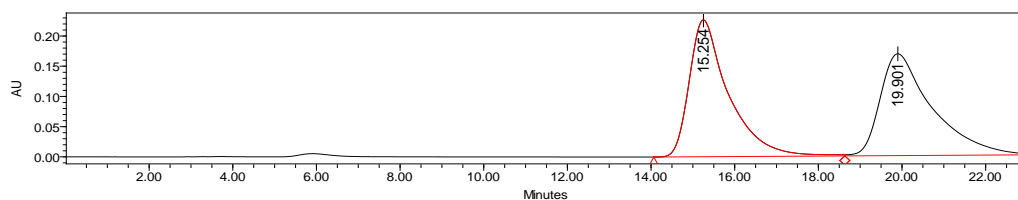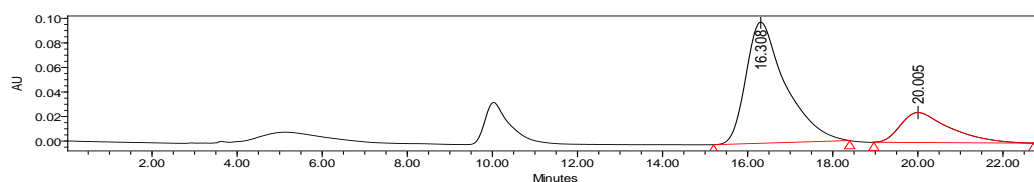

### diethyl 3-diazo-2-hydroxy-2-phenylsuccinate

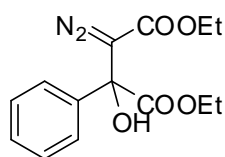

$\text{C}_{13}\text{H}_{14}\text{N}_2\text{O}_6$ ) a yellow solid; 75% yield, 94% *ee*,  $[\alpha]_{\text{D}}^{27}$   
= +192.0 (*c* = 0.20 in  $\text{CH}_2\text{Cl}_2$ ); HPLC DAICEL

CHIRALCEL AD, 2-propanol/n-hexane = 20/80, flow rate = 1.0 mL/min,  
 $\lambda$  = 254 nm, retention time: 7.1 min (major) and 13.5 min (minor);  $^1\text{H}$   
NMR (400 MHz,  $\text{CDCl}_3$ ) 3.81 (s, 3H), 3.82 (s, 3H), 4.63 (s, 1H),  
7.49-7.74 (m, 7H) ppm;  $^{13}\text{C}$  NMR (100 MHz,  $\text{CDCl}_3$ ) 28.6, 51.2, 53.1,  
122.4, 125.1, 125.5, 125.9, 126.5, 127.6, 127.6, 128.1, 132.0, 132.3,  
165.1, 171.5 ppm.

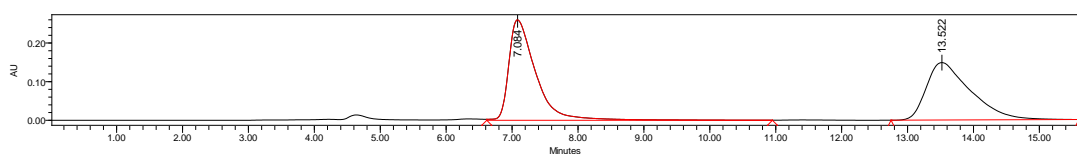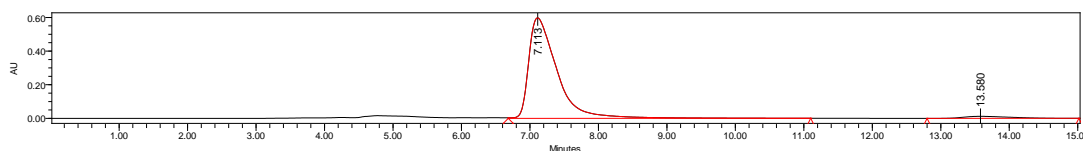

### diethyl 2-hydroxy-2-phenylsuccinate

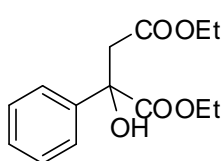

$\text{C}_{13}\text{H}_{14}\text{N}_2\text{O}_6$ ) a yellow liquid; 80% yield, 94% *ee*,  $[\alpha]_{\text{D}}^{27}$  =  
+6.5 (*c* = 0.10 in  $\text{CH}_2\text{Cl}_2$ ); HPLC DAICEL CHIRALCEL  
AD-H, 2-propanol/n-hexane = 20/80, flow rate = 1.0

mL/min,  $\lambda$  = 254 nm, retention time: 14.2 min (minor) and 15.1 min  
(major); This compound was identical in all respects ( $^1\text{H}$ NMR,  $^{13}\text{C}$ NMR,  
mass spectra) to that previously reported. <sup>4</sup>

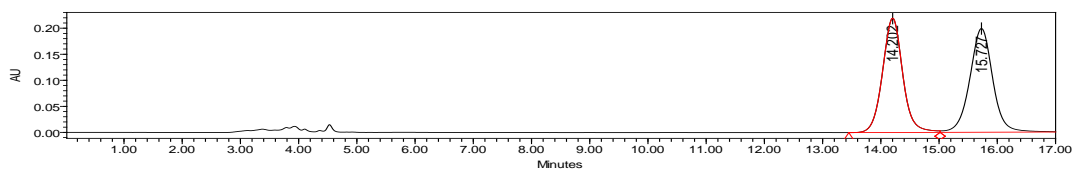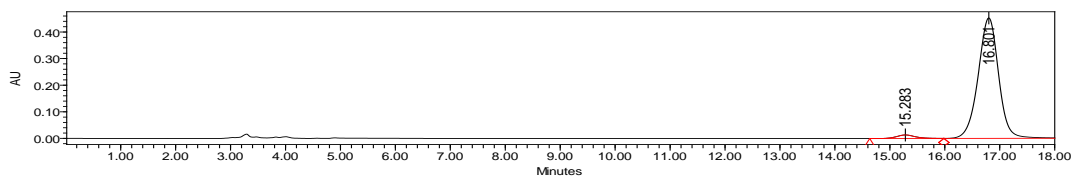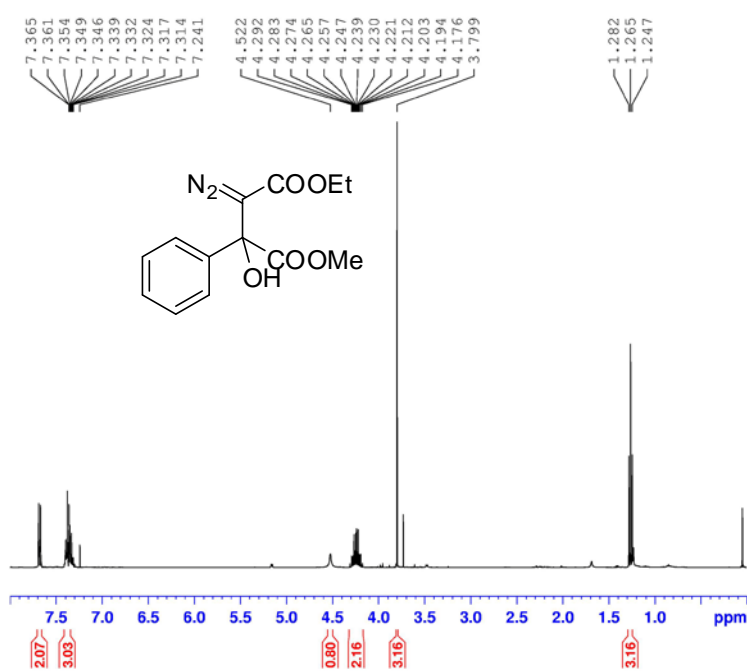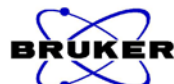

Current Data Parameters  
NAME 2009-05-13 wangfei-D-D  
EXPNO 1  
PROCNO 1

F2 - Acquisition Parameters  
Date\_ 20090513  
Time 17.52  
INSTRUM spect  
PROBHD 5 mm F400 BBO  
PULPROG zg30  
TD 65536  
SOLVENT CDCl3  
NS 16  
DS 0  
SWH 8223.685 Hz  
FIDRES 0.125483 Hz  
AQ 3.9866387 sec  
RG 90.5  
DW 60.600 usec  
DE 6.50 usec  
TE 295.9 K  
D1 1.0000000 sec  
TD0 1

----- CHANNEL f1 -----  
NUC1 1H  
P1 12.00 usec  
PL1 -2.00 dB  
SFO1 400.1324710 MHz

F2 - Processing parameters  
SI 32768  
SF 400.1300173 MHz  
MW OK  
SSB 0  
LB -0.40 Hz  
GB 0.3  
PC 1.00

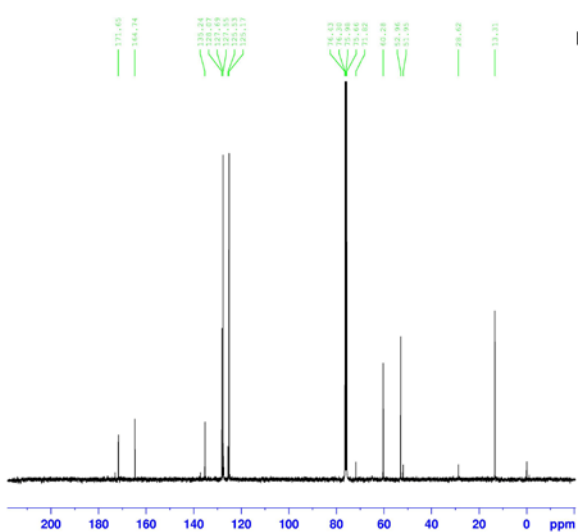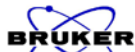

Current Data Parameters  
NAME 2009-05-13 wangfei-D-D  
EXPNO 2  
PROCNO 1

F2 - Acquisition Parameters  
Date\_ 20090513  
Time 18.21  
INSTRUM spect  
PROBHD 5 mm F400 BBO  
PULPROG zgpg30  
TD 65536  
SOLVENT CDCl3  
NS 8  
DS 0  
SWH 24036.441 Hz  
FIDRES 0.388798 Hz  
AQ 1.3631388 sec  
RG 144  
DW 20.600 usec  
DE 6.50 usec  
TE 295.9 K  
D1 2.0000000 sec  
d11 0.0300000 sec  
DELTA 1.8999999 sec  
TD0 1

----- CHANNEL f1 -----  
NUC1 13C  
P1 15.00 usec  
PL1 -1.00 dB  
SFO1 100.6228298 MHz

----- CHANNEL f2 -----  
CPDPRG2 waltz16  
NUC2 1H  
PCPD2 60.00 usec  
PL12 11.35 dB  
PL13 13.05 dB  
PL2 -2.00 dB  
SFO2 400.1316005 MHz

F2 - Processing parameters  
SI 32768  
SF 100.6128773 MHz  
MW OK  
SSB 0  
LB 2.00 Hz  
GB 0  
PC 1.40

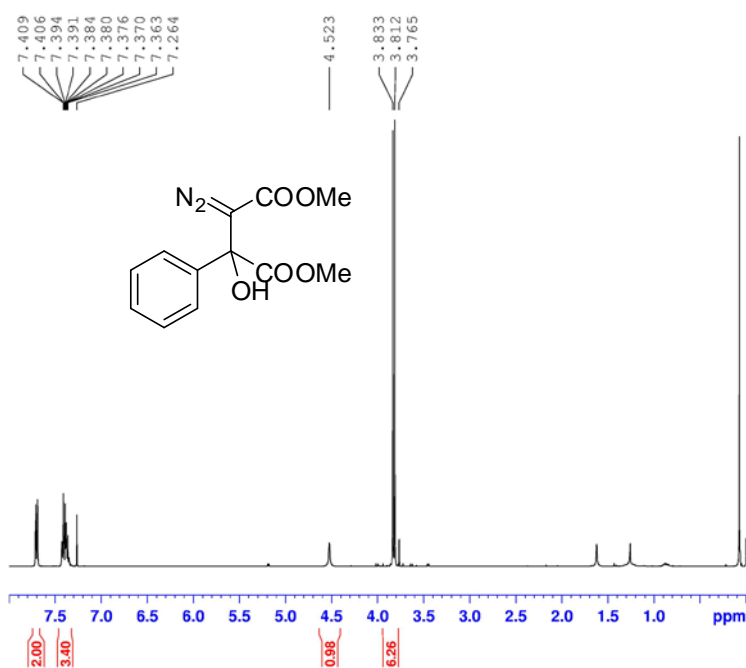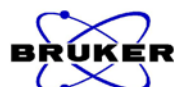

Current Data Parameters  
 NAME 2009-05-18 wangfei-0-0  
 EXNO 1  
 PROCNO 1

F2 - Acquisition Parameters  
 Date\_ 20090518  
 Time 17.58  
 INSTRUM spect  
 PROBHD 5 mm PABBO BB-  
 PULPROG zg30  
 TD 65536  
 SOLVENT CDCl3  
 NS 16  
 DS 0  
 SWS 8223.685 Hz  
 FIDRES 0.123483 Hz  
 AQ 3.9846387 sec  
 RG 96.5  
 SW 60.800 usec  
 DE 6.50 usec  
 TE 297.0 K  
 D1 1.0000000 sec  
 TDS 1

----- CHANNEL f1 -----  
 NUC1 1H  
 P1 12.00 usec  
 PL1 -2.00 dB  
 SF01 400.1324710 MHz

F2 - Processing parameters  
 SI 32768  
 SF 400.1300078 MHz  
 MEW EM  
 SSB 0  
 LB 0.30 Hz  
 GB 0  
 PC 1.00

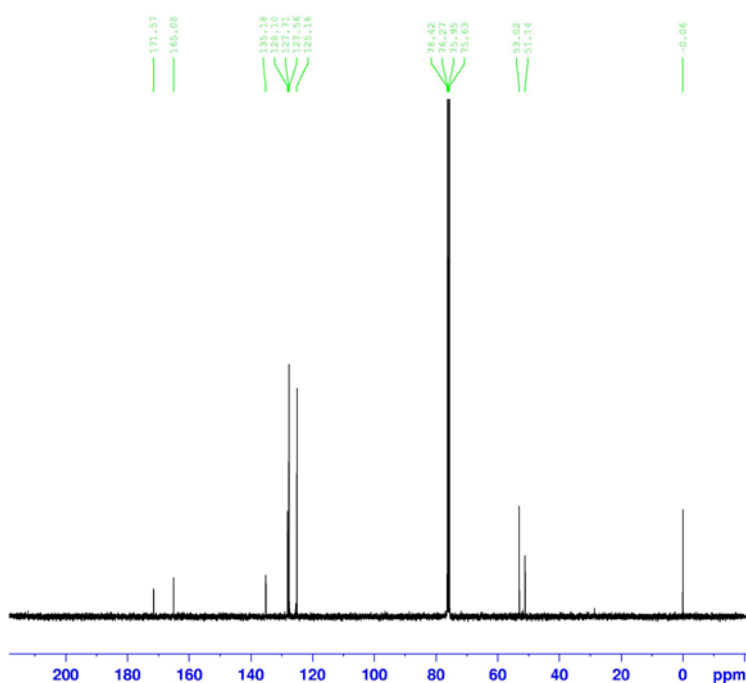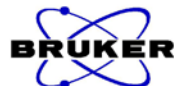

Current Data Parameters  
 NAME 2009-05-18 wangfei-0-0  
 EXNO 2  
 PROCNO 1

F2 - Acquisition Parameters  
 Date\_ 20090518  
 Time 18.27  
 INSTRUM spect  
 PROBHD 5 mm PABBO BB-  
 PULPROG zgpg30  
 TD 65536  
 SOLVENT CDCl3  
 NS 512  
 DS 0  
 SWS 24036.461 Hz  
 FIDRES 0.366798 Hz  
 AQ 1.3631988 sec  
 RG 2050  
 SW 20.800 usec  
 DE 6.50 usec  
 TE 298.3 K  
 D1 2.0000000 sec  
 d11 0.0300000 sec  
 DELTA 1.8999998 sec  
 TDS 1

----- CHANNEL f1 -----  
 NUC1 13C  
 P1 15.50 usec  
 PL1 -1.00 dB  
 SF01 100.6228298 MHz

----- CHANNEL f2 -----  
 CFPRG2 waltz16  
 NUC2 1H  
 PCPD2 60.00 usec  
 PL12 11.35 dB  
 PL13 13.05 dB  
 PL2 -2.00 dB  
 SF02 400.1316005 MHz

F2 - Processing parameters  
 SI 32768  
 SF 100.6128773 MHz  
 MEW EM  
 SSB 0  
 LB 1.00 Hz  
 GB 0  
 PC 1.40

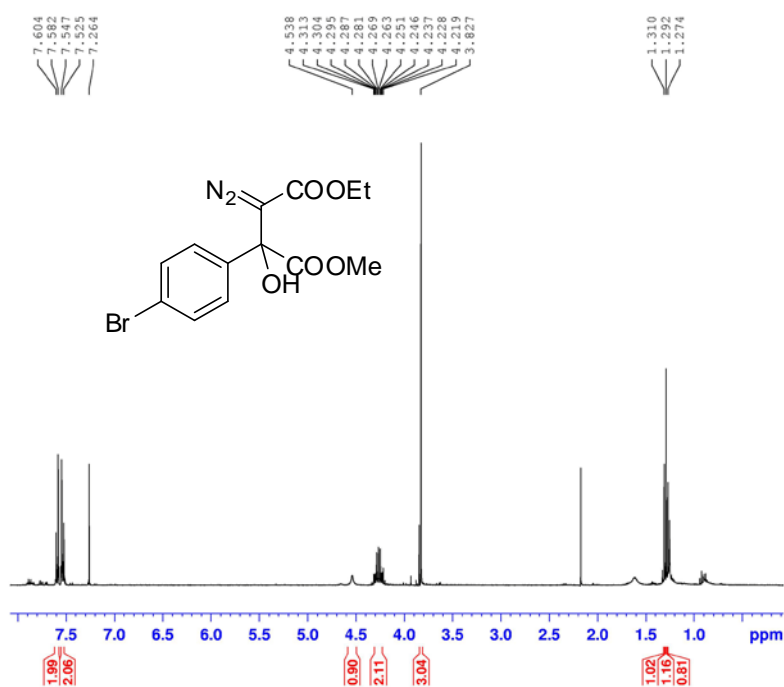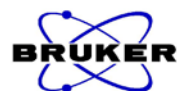

Current Data Parameters  
 NAME 2009-05-05 wangfei-D-1  
 EXPNO 1  
 PROCNO 1

F2 - Acquisition Parameters  
 Date\_ 20090505  
 Time 22.18  
 INSTRUM spect  
 PROBRD 5 mm PABBO BB-  
 PULPROG zg30  
 TD 65536  
 SOLVENT CDCl3  
 NS 16  
 DS 2  
 SWH 823.685 Hz  
 FIDRES 0.125483 Hz  
 AQ 3.9846387 sec  
 RG 4  
 DW 60.800 usec  
 DE 6.50 usec  
 TE 296.0 K  
 D1 1.0000000 sec  
 TD0 1

----- CHANNEL f1 -----  
 NUC1 1H  
 P1 12.00 usec  
 PL1 -2.00 dB  
 SF01 400.1324710 MHz

F2 - Processing parameters  
 SI 32768  
 SF 400.1300081 MHz  
 MEW EM  
 SSB 0  
 LB -0.10 Hz  
 GB 1.3  
 PC 1.00

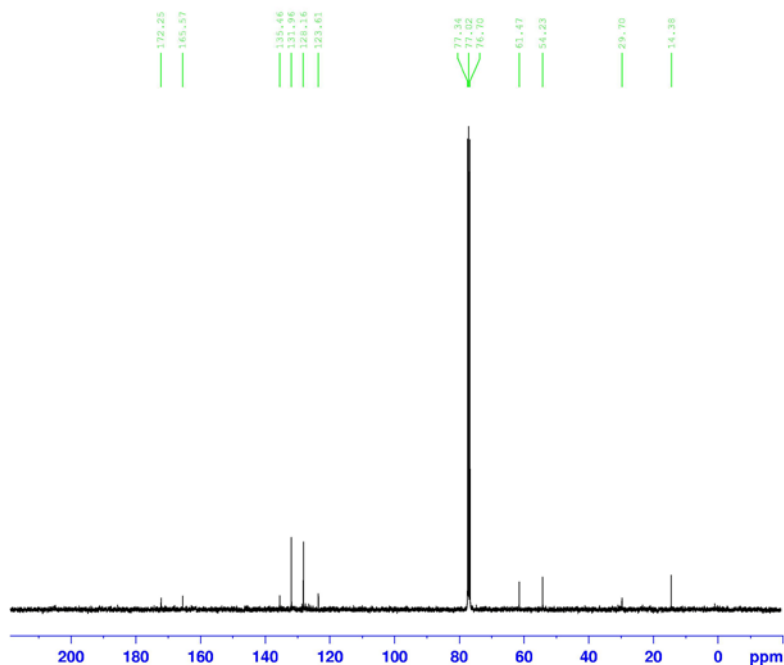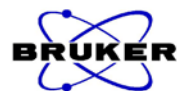

Current Data Parameters  
 NAME 2009-05-05 wangfei-D-1  
 EXPNO 2  
 PROCNO 1

F2 - Acquisition Parameters  
 Date\_ 20090505  
 Time 22.14  
 INSTRUM spect  
 PROBRD 5 mm PABBO BB-  
 PULPROG zgpg30  
 TD 65536  
 SOLVENT CDCl3  
 NS 512  
 DS 0  
 SWH 24038.461 Hz  
 FIDRES 0.366798 Hz  
 AQ 1.3631988 sec  
 RG 2050  
 DW 20.800 usec  
 DE 6.50 usec  
 TE 297.2 K  
 D1 2.0000000 sec  
 d11 0.8300000 sec  
 DELTA 1.89999998 sec  
 TD0 1

----- CHANNEL f1 -----  
 NUC1 13C  
 P1 15.00 usec  
 PL1 -1.00 dB  
 SF01 100.6228298 MHz

----- CHANNEL f2 -----  
 CDPFRG2 waltz16  
 NUC2 1H  
 PCPD2 60.00 usec  
 PL12 11.25 dB  
 PL13 13.05 dB  
 PL2 -2.00 dB  
 SF02 400.1316005 MHz

F2 - Processing parameters  
 SI 32768  
 SF 100.6127630 MHz  
 MEW EM  
 SSB 0  
 LB 2.00 Hz  
 GB 0  
 PC 1.40

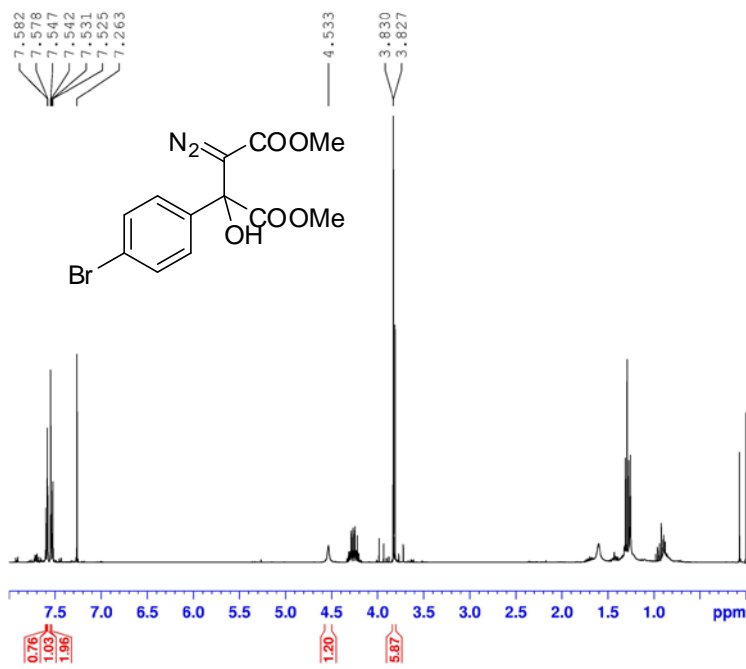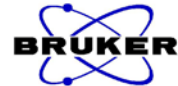

```

Current Data Parameters
NAME      2009-05-05 wangfei-0-1'
EXNO     1
PROCNO   1

F2 - Acquisition Parameters
Date_    20090506
Time     1.06
INSTRUM spect
PROBHD   5 mm PABBO BB-
PULPROG zg30
TD        65536
SOLVENT  CDCl3
NS        16
DS        0
SWS      8223.685 Hz
FIDRES   0.123483 Hz
AQ        3.9846387 sec
RG        144
SW        60.800 usec
DE        6.50 usec
TE        296.4 K
D1        1.0000000 sec
TD0       1

===== CHANNEL f1 =====
NUC1     13
P1       12.00 usec
PL1      -2.00 dB
SFO1    400.1324710 MHz

F2 - Processing parameters
SI       32768
SF       400.1300081 MHz
MEW      0M
SGB      0
LB       -0.40 Hz
GB       0.1
PC       1.00
    
```

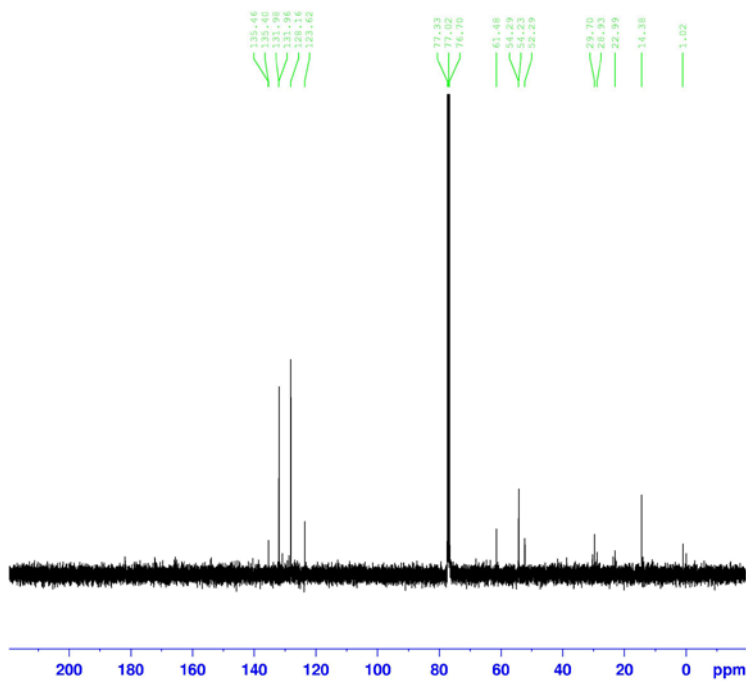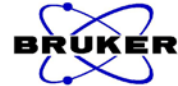

```

Current Data Parameters
NAME      2009-05-05 wangfei-0-1'
EXNO     2
PROCNO   1

F2 - Acquisition Parameters
Date_    20090506
Time     1.35
INSTRUM spect
PROBHD   5 mm PABBO BB-
PULPROG zgpg30
TD        65536
SOLVENT  CDCl3
NS        512
DS        0
SWS      24036.461 Hz
FIDRES   0.366798 Hz
AQ        1.3631988 sec
RG        181
SW        20.800 usec
DE        6.50 usec
TE        297.3 K
D1        2.0000000 sec
d11      0.0300000 sec
DELTA    1.8999998 sec
TD0       1

===== CHANNEL f1 =====
NUC1     13C
P1       15.50 usec
PL1      -1.00 dB
SFO1    100.6228298 MHz

===== CHANNEL f2 =====
CFDPRG2  waltz16
NUC2     1H
PCPDZ    60.00 usec
PL12     11.35 dB
PL13     13.05 dB
PL2      -2.00 dB
SFO2    400.1316005 MHz

F2 - Processing parameters
SI       32768
SF       100.6127690 MHz
MEW      0M
SGB      0
LB       0.50 Hz
GB       0
PC       1.40
    
```



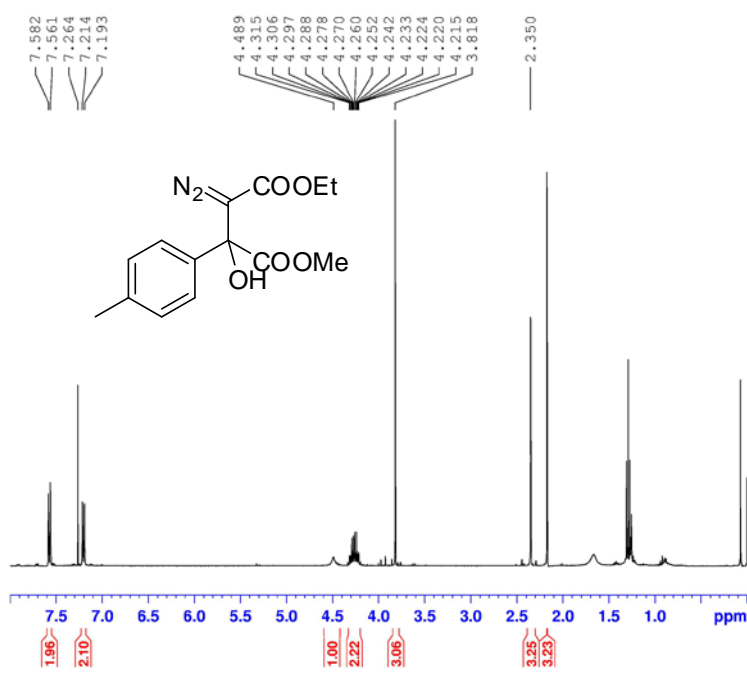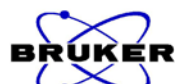

Current Data Parameters  
 NAME 2009-05-05 wangfei-D-2  
 EXPNO 1  
 PROCNO 1

F2 - Acquisition Parameters  
 Date\_ 20090505  
 Time 22.32  
 INSTRUM spect  
 PROBRD 5 mm PABBO BB-  
 PULPROG zg30  
 TD 65336  
 SOLVENT CDCl3  
 NS 16  
 DS 0  
 SWH 823.685 Hz  
 FIDRES 0.125483 Hz  
 AQ 3.9846387 sec  
 RG 144  
 DW 60.800 usec  
 DE 6.50 usec  
 TE 295.7 K  
 D1 1.0000000 sec  
 TDS 1

----- CHANNEL f1 -----  
 NUC1 1H  
 P1 12.00 usec  
 PL1 -2.00 dB  
 SF01 400.1324710 MHz

F2 - Processing parameters  
 SI 32768  
 SF 400.1300079 MHz  
 MEW 0K  
 SSB 0  
 LB -0.20 Hz  
 GB 1.1  
 PC 1.00

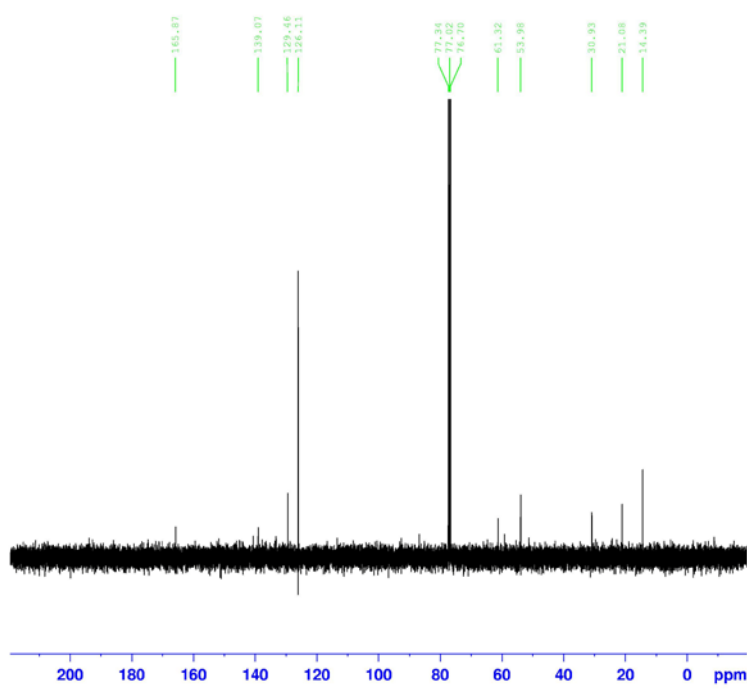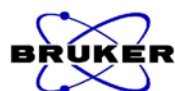

Current Data Parameters  
 NAME 2009-05-05 wangfei-D-2  
 EXPNO 2  
 PROCNO 1

F2 - Acquisition Parameters  
 Date\_ 20090505  
 Time 23.07  
 INSTRUM spect  
 PROBRD 5 mm PABBO BB-  
 PULPROG zgpg30  
 TD 65336  
 SOLVENT CDCl3  
 NS 512  
 DS 0  
 SWH 24038.461 Hz  
 FIDRES 0.366798 Hz  
 AQ 1.3631388 sec  
 RG 181  
 DW 20.800 usec  
 DE 6.50 usec  
 TE 297.3 K  
 D1 2.0000000 sec  
 d11 0.8300000 sec  
 DELTA 1.89999998 sec  
 TDS 1

----- CHANNEL f1 -----  
 NUC1 13C  
 P1 15.00 usec  
 PL1 -1.00 dB  
 SF01 100.6228298 MHz

----- CHANNEL f2 -----  
 CDPFRG2 waltz16  
 NUC2 1H  
 PCPD2 60.00 usec  
 PL12 11.25 dB  
 PL13 13.05 dB  
 PL2 -2.00 dB  
 SF02 400.1316005 MHz

F2 - Processing parameters  
 SI 32768  
 SF 100.6127630 MHz  
 MEW 0K  
 SSB 0  
 LB -0.30 Hz  
 GB 1.1  
 PC 1.40

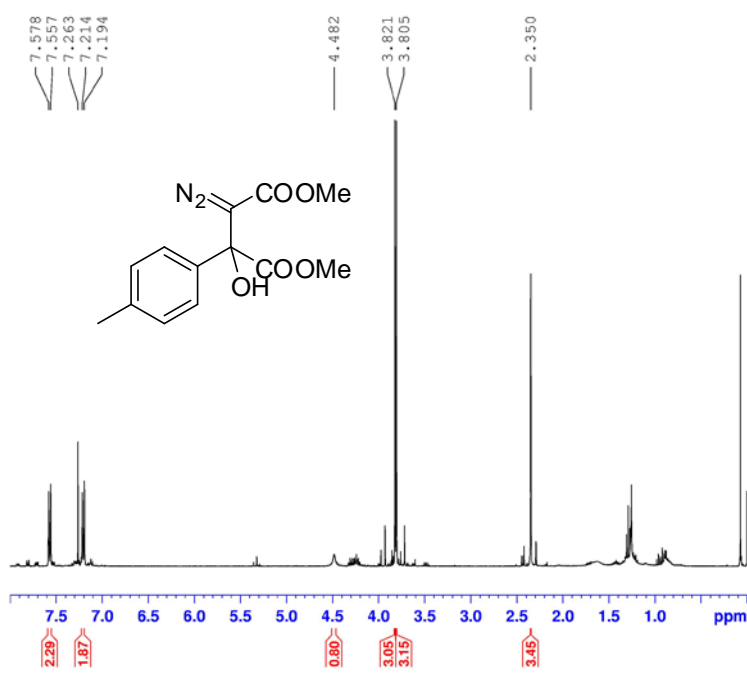

```

Current Data Parameters
NAME      2009-05-20 wangfei-0-2*
EXPNO    1
PROCNO   1

F2 - Acquisition Parameters
Date_    20090520
Time     21:47
INSTRUM  spect
PROBHD   5 mm PABBO BB-
PULPROG  zg30
TD        65536
SOLVENT  CDCl3
NS        16
DS        0
SWS      8223.685 Hz
FIDRES   0.123483 Hz
AQ        3.9846387 sec
RG        96.5
SW        60.800 usec
DE        6.50 usec
TE        296.1 K
D1        1.0000000 sec
TD0       1

===== CHANNEL f1 =====
NUC1      1H
P1        12.00 usec
PL1       -2.00 dB
SFO1      400.1324710 MHz

F2 - Processing parameters
SI        32768
SF        400.1300082 MHz
MEW       0M
SGB       0
LB        -0.40 Hz
GB        0.3
PC        1.00
    
```

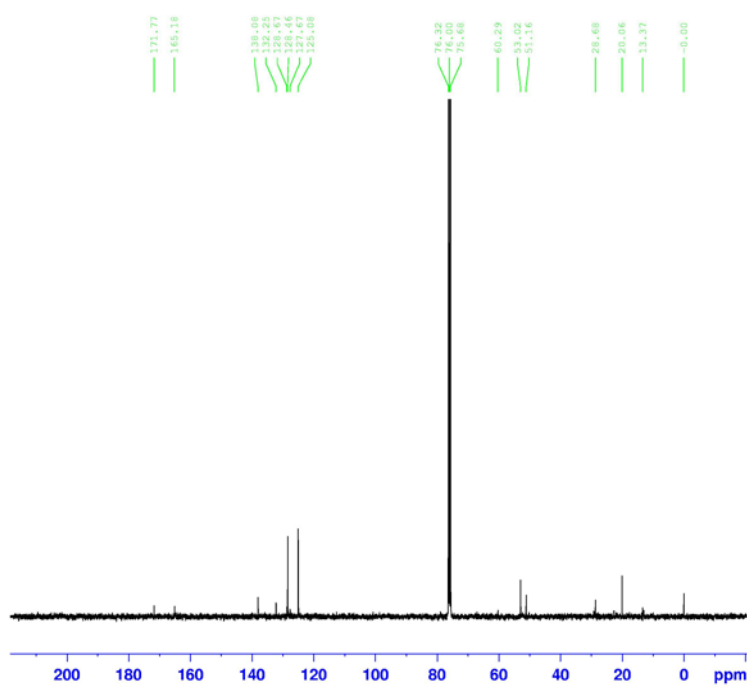

```

Current Data Parameters
NAME      2009-05-20 wangfei-0-2*
EXPNO    2
PROCNO   1

F2 - Acquisition Parameters
Date_    20090520
Time     22:17
INSTRUM  spect
PROBHD   5 mm PABBO BB-
PULPROG  zgpg30
TD        65536
SOLVENT  CDCl3
NS        512
DS        0
SWS      24036.461 Hz
FIDRES   0.366798 Hz
AQ        1.3631988 sec
RG        2050
SW        20.800 usec
DE        6.50 usec
TE        296.9 K
D1        2.0000000 sec
d11       0.0300000 sec
DELTA    1.8999998 sec
TD0       1

===== CHANNEL f1 =====
NUC1      13C
P1        15.50 usec
PL1       -1.00 dB
SFO1      100.6228298 MHz

===== CHANNEL f2 =====
CFDPRG2  waltz16
NUC2      1H
PCPDZ    60.00 usec
PL12     11.35 dB
PL13     13.05 dB
PL2      -2.00 dB
SFO2     400.1316005 MHz

F2 - Processing parameters
SI        32768
SF        100.6128721 MHz
MEW       0M
SGB       0
LB        2.00 Hz
GB        0
PC        1.40
    
```

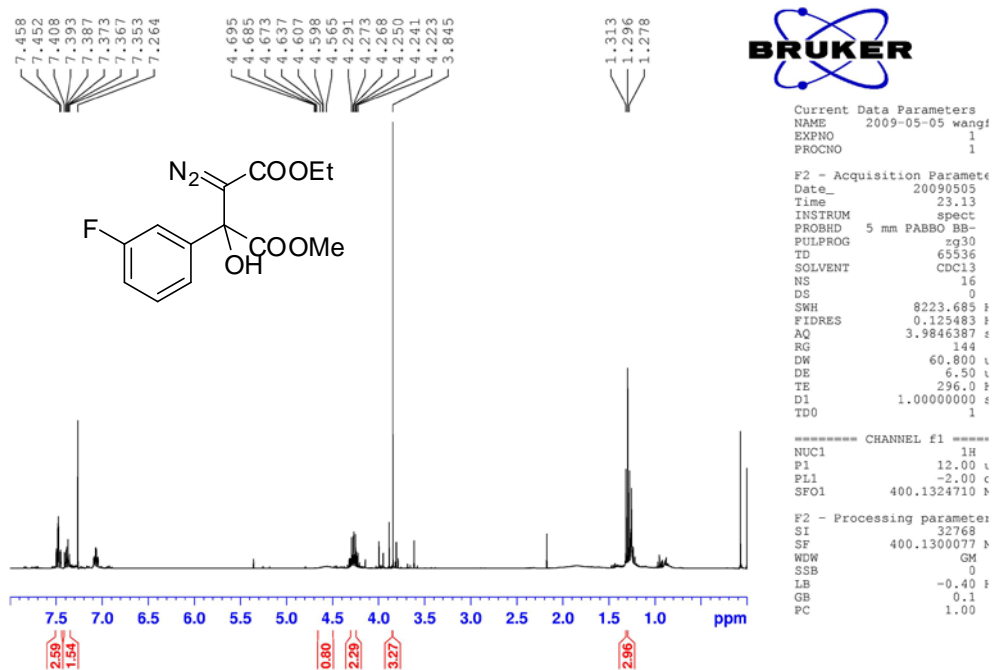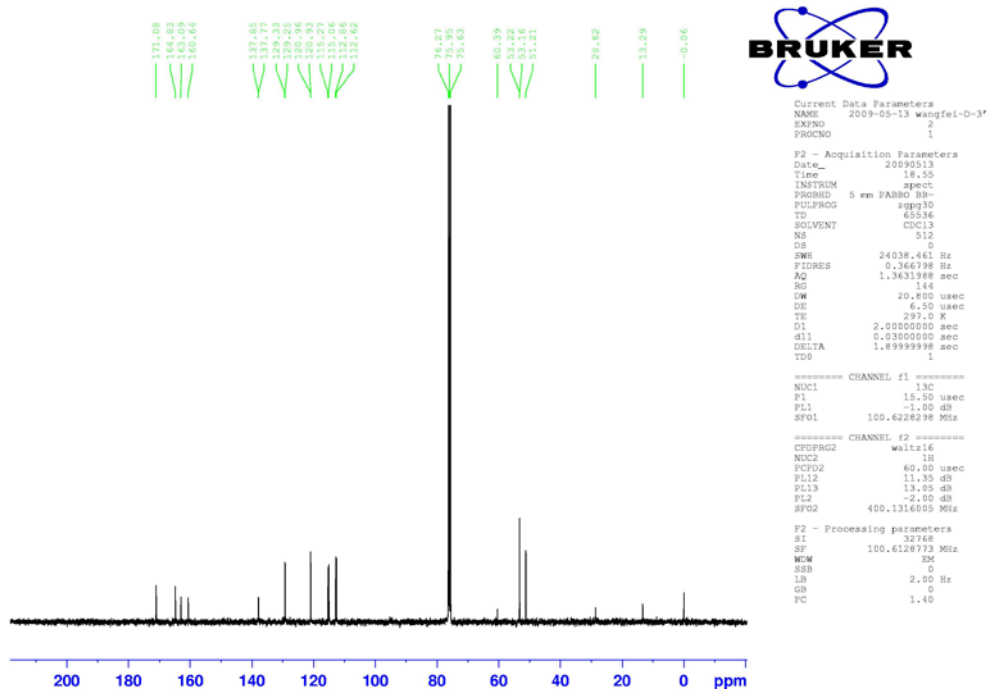

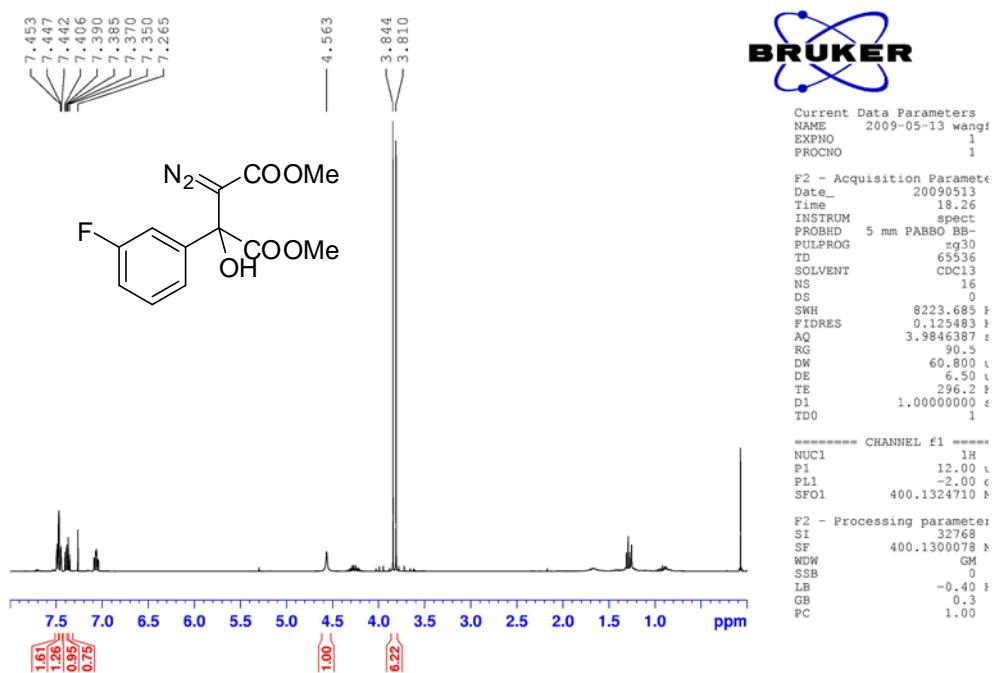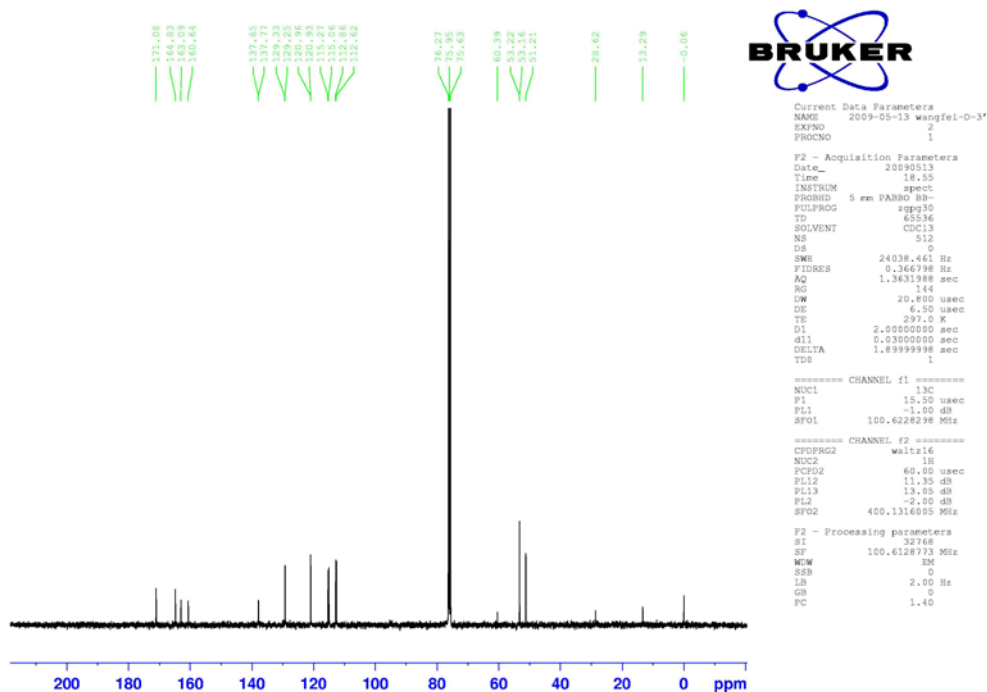

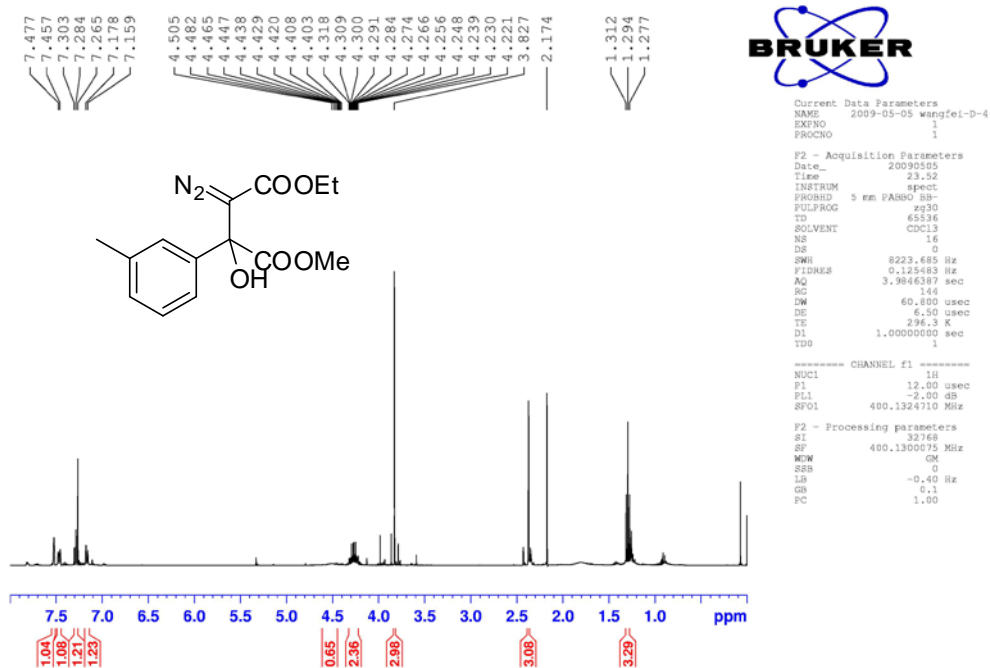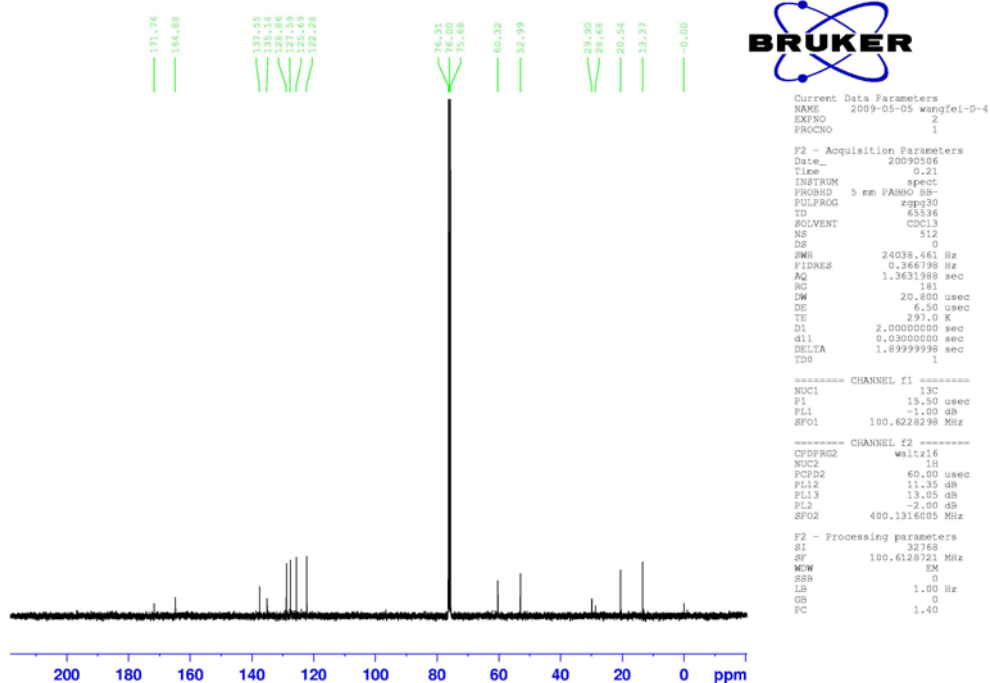

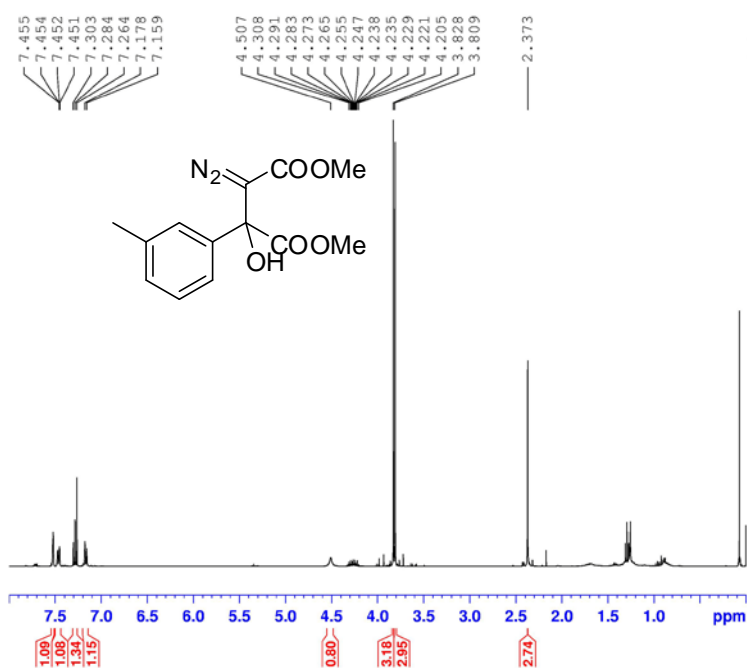

Current Data Parameters  
NAME 2009-05-13 wangfei-D-4  
EXNO 1  
PROCNO 1

F2 - Acquisition Parameters  
Date\_ 20090514  
Time 9.52  
INSTRUM spect  
PROBHD 5 mm PABBO BB-  
PULPROG zg30  
TD 65536  
SOLVENT CDCl3  
NS 16  
DS 0  
SWS 8223.685 Hz  
FIDRES 0.123483 Hz  
AQ 3.9846387 sec  
RG 96.5  
SW 60.490 usec  
DE 6.50 usec  
TE 295.3 K  
D1 1.0000000 sec  
TD0 1

----- CHANNEL f1 -----  
NUC1 1H  
P1 12.00 usec  
PL1 -2.00 dB  
SFO1 400.1324710 MHz

F2 - Processing parameters  
SI 32768  
SF 400.1300078 MHz  
MEW GM  
SGB 0  
LB -0.40 Hz  
GB 0.3  
PC 1.00

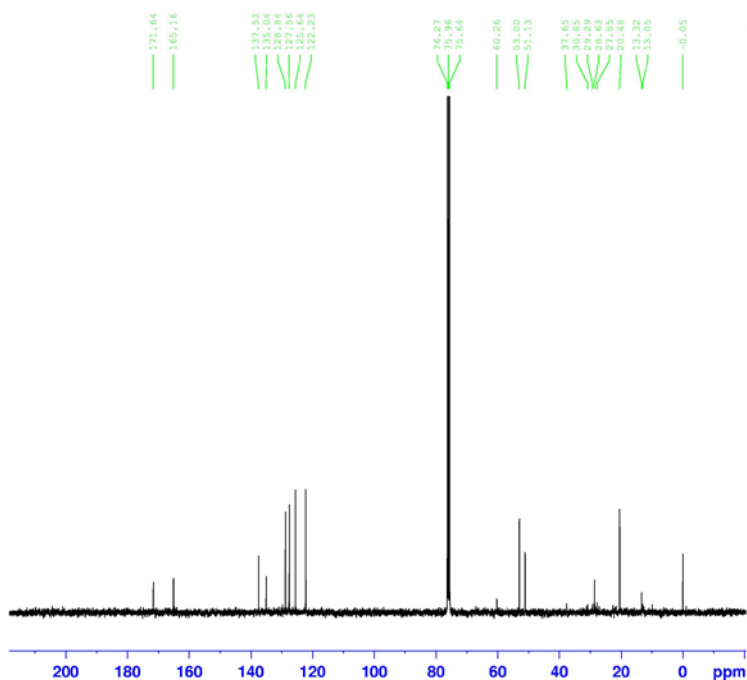

Current Data Parameters  
NAME 2009-05-13 wangfei-D-4  
EXNO 2  
PROCNO 1

F2 - Acquisition Parameters  
Date\_ 20090514  
Time 10.24  
INSTRUM spect  
PROBHD 5 mm PABBO BB-  
PULPROG zgpg30  
TD 65536  
SOLVENT CDCl3  
NS 512  
DS 0  
SWS 24036.461 Hz  
FIDRES 0.366798 Hz  
AQ 1.3631988 sec  
RG 144  
SW 20.490 usec  
DE 6.50 usec  
TE 296.5 K  
D1 2.0000000 sec  
d11 0.0300000 sec  
DELTA 1.8999998 sec  
TD0 1

----- CHANNEL f1 -----  
NUC1 13C  
P1 15.50 usec  
PL1 -1.00 dB  
SFO1 100.6228298 MHz

----- CHANNEL f2 -----  
CFPRG2 waltz16  
NUC2 1H  
PCPDZ 60.00 usec  
PL12 11.35 dB  
PL13 13.05 dB  
PL2 -2.00 dB  
SFO2 400.1316005 MHz

F2 - Processing parameters  
SI 32768  
SF 100.6128773 MHz  
MEW EM  
SGB 0  
LB 2.00 Hz  
GB 0  
PC 1.40

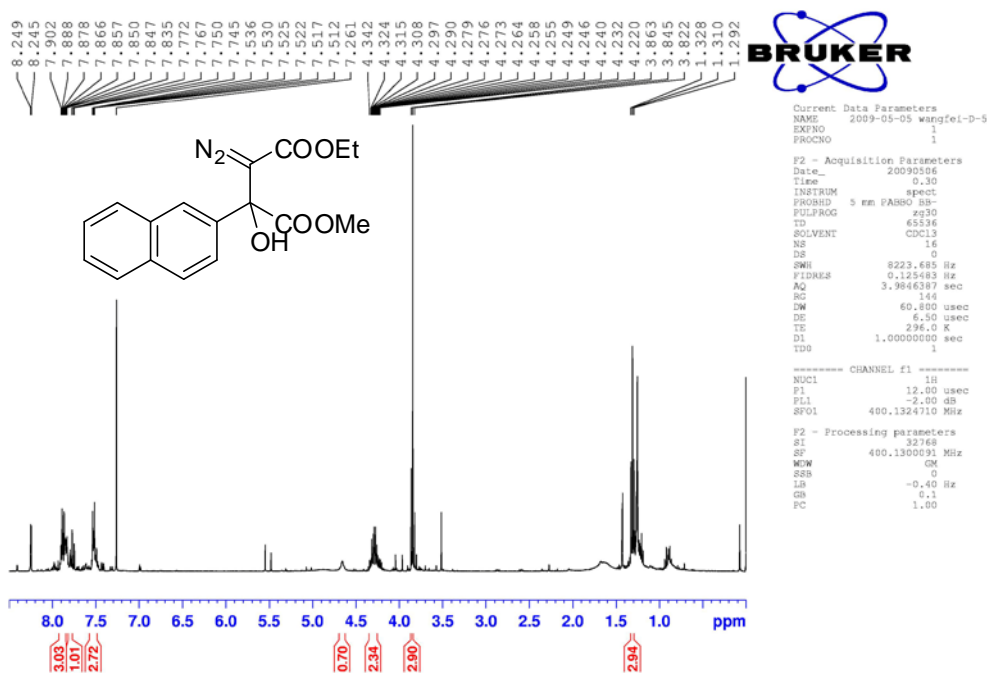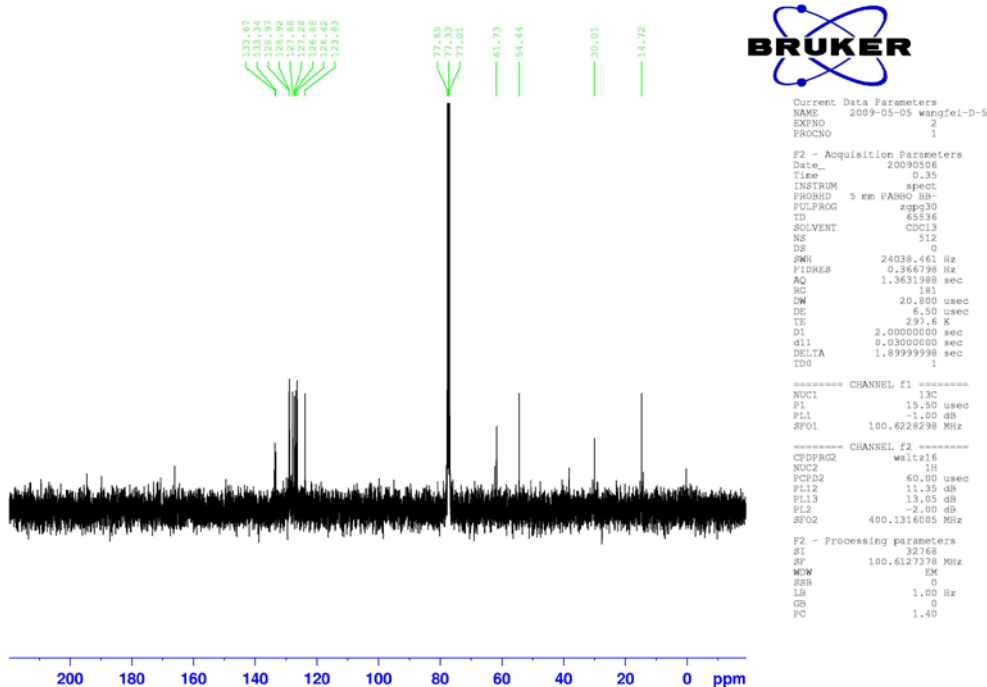

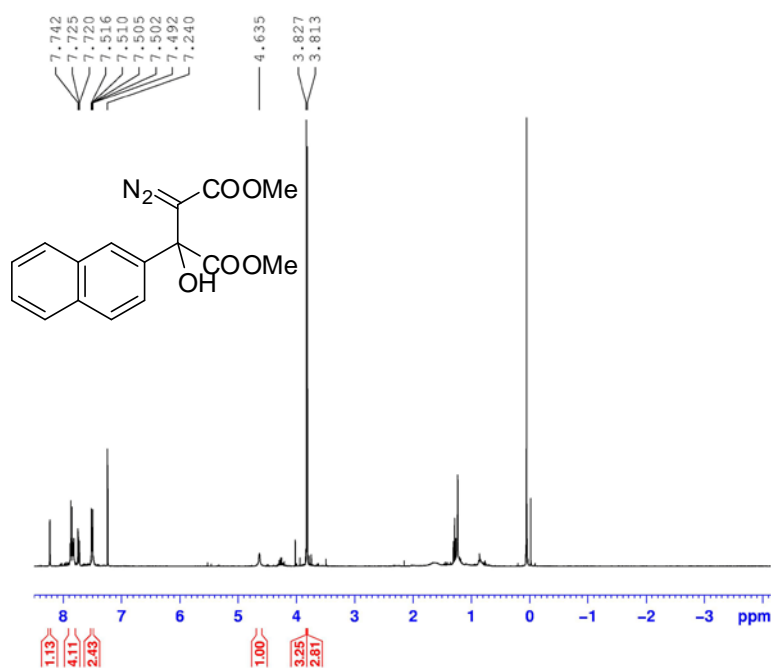

```

Current Data Parameters
NAME      2009-05-26 wangfei-D-5*
EXNO     1
PROCNO   1

F2 - Acquisition Parameters
Date_    20090526
Time     17.23
INSTRUM spect
PROBHD   5 mm PABBO BB-
PULPROG zg30
TD       65536
SOLVENT  CDCl3
NS       16
DS       0
SWH      8223.685 Hz
FIDRES   0.123483 Hz
AQ       3.9846387 sec
RG       96.5
SW       60.400 usec
DE       6.50 usec
TE       295.7 K
D1       1.0000000 sec
TD0      1

----- CHANNEL f1 -----
NUC1     13C
P1       12.00 usec
PL1      -2.00 dB
SFO1     400.1324710 MHz

F2 - Processing parameters
SI       32768
SF       400.1300176 MHz
WDW      EM
SSB      0
LB       -0.40 Hz
GB       0.3
PC       1.00
    
```

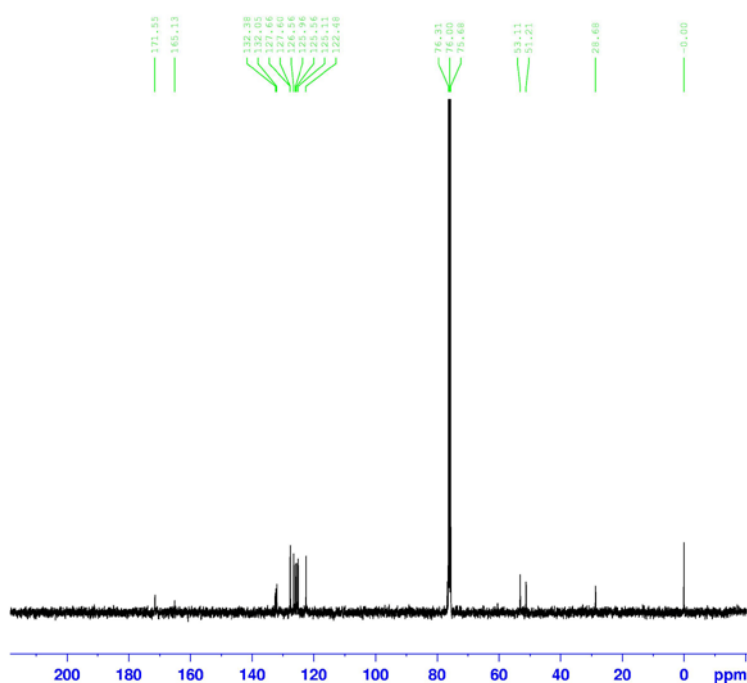

```

Current Data Parameters
NAME      2009-05-26 wangfei-D-5*
EXNO     2
PROCNO   1

F2 - Acquisition Parameters
Date_    20090526
Time     17.52
INSTRUM spect
PROBHD   5 mm PABBO BB-
PULPROG zgpg30
TD       65536
SOLVENT  CDCl3
NS       512
DS       0
SWH      24036.461 Hz
FIDRES   0.366798 Hz
AQ       1.3631988 sec
RG       2050
SW       20.400 usec
DE       6.50 usec
TE       299.4 K
D1       2.0000000 sec
d11      0.0300000 sec
DELTA    1.8999998 sec
TD0      1

----- CHANNEL f1 -----
NUC1     13C
P1       15.50 usec
PL1      -1.00 dB
SFO1     100.6228298 MHz

----- CHANNEL f2 -----
CFOPRG2 waltz16
NUC2     1H
PCPD2    60.00 usec
PL12     11.35 dB
PL13     13.05 dB
PL2      -2.00 dB
SFO2     400.1316005 MHz

F2 - Processing parameters
SI       32768
SF       100.6128696 MHz
WDW      EM
SSB      0
LB       2.00 Hz
GB       0
PC       1.40
    
```



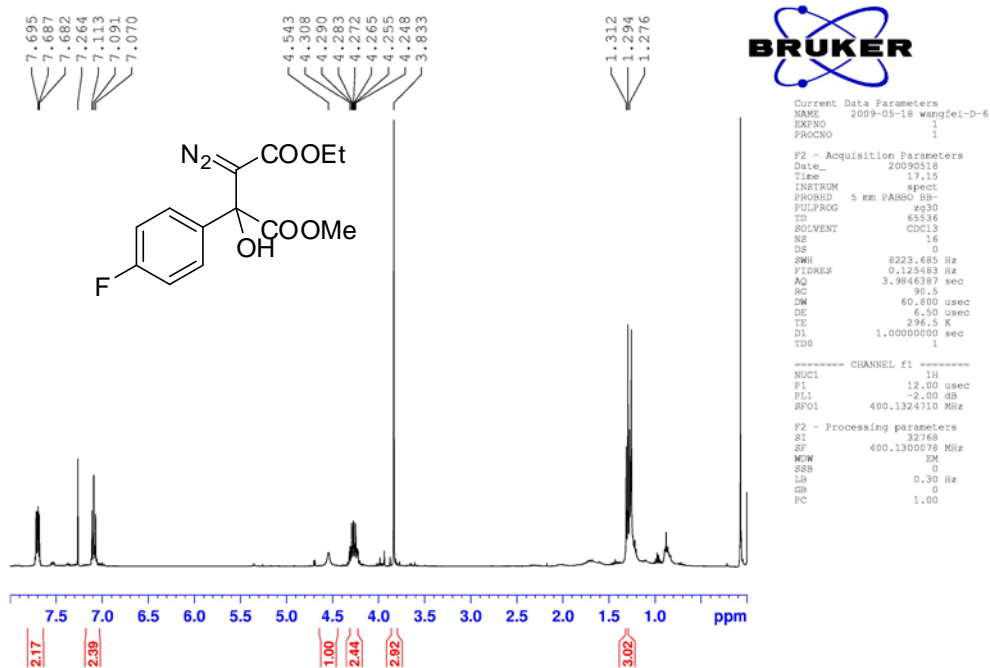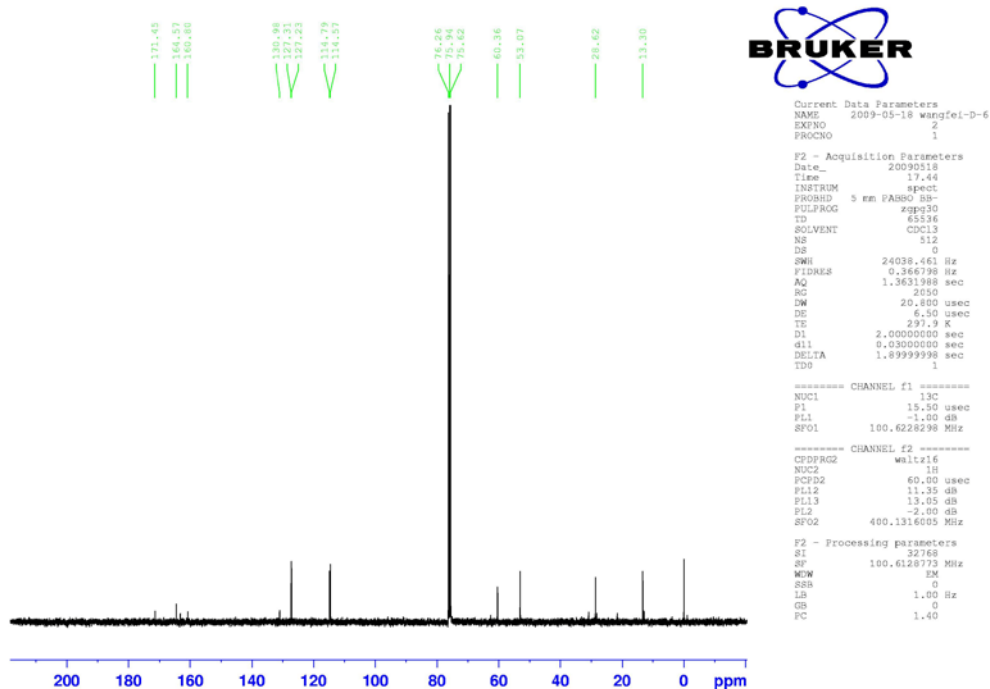

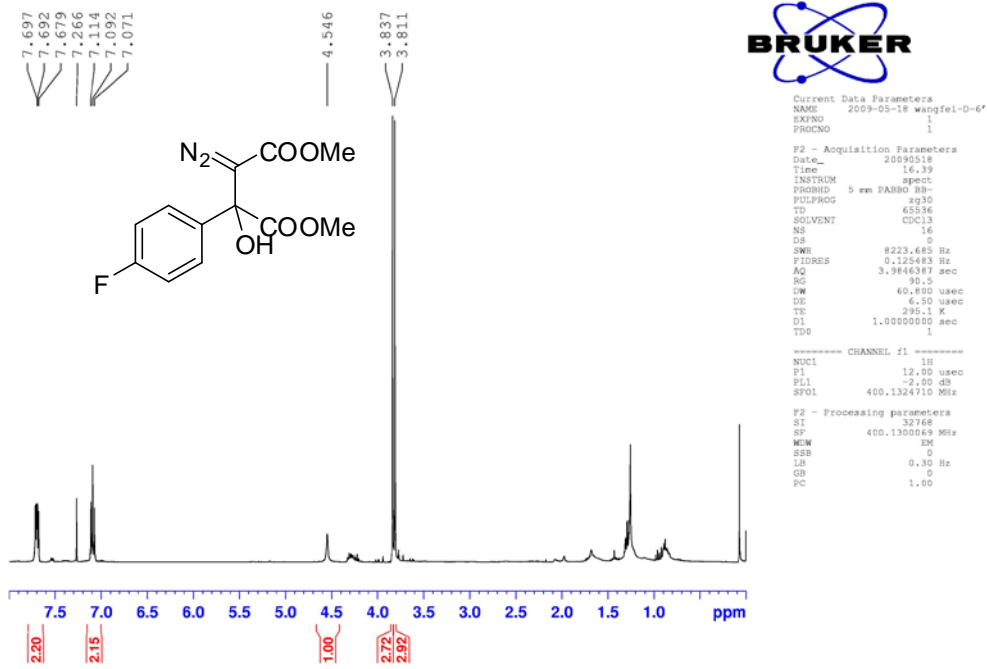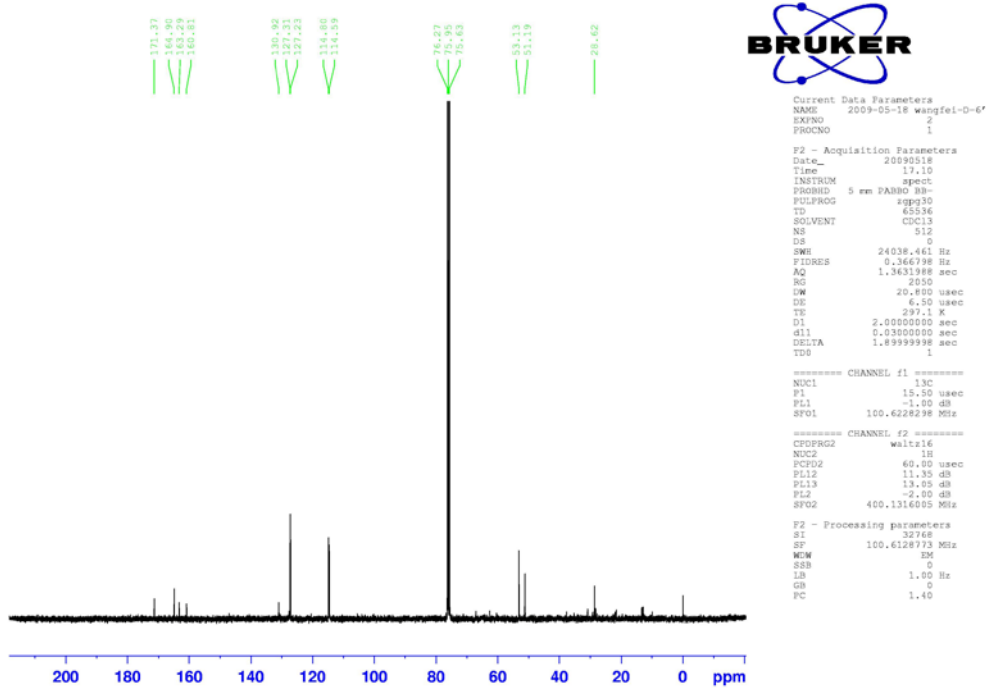

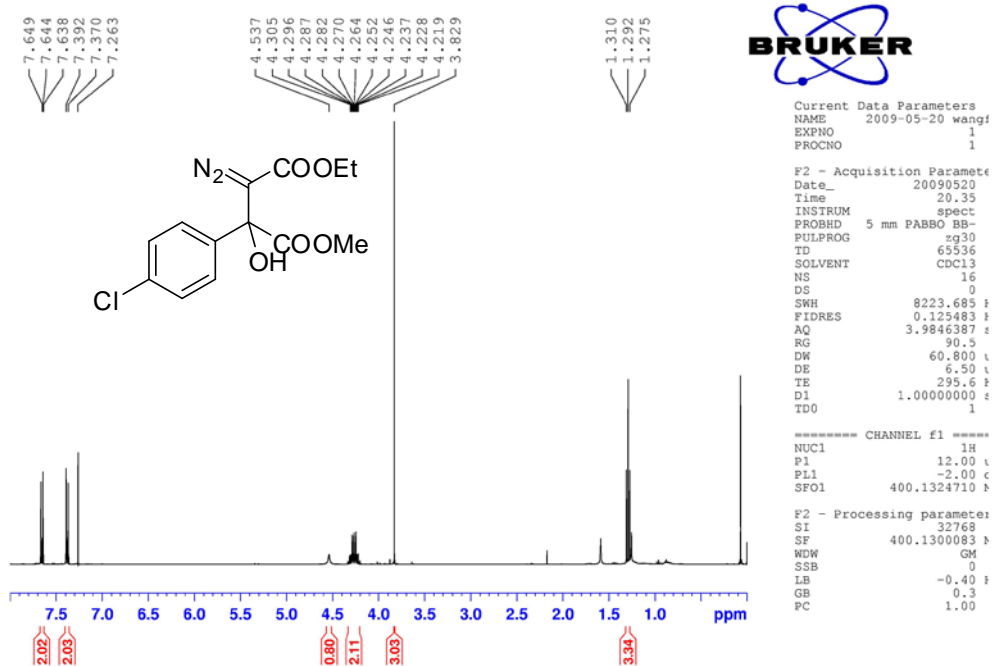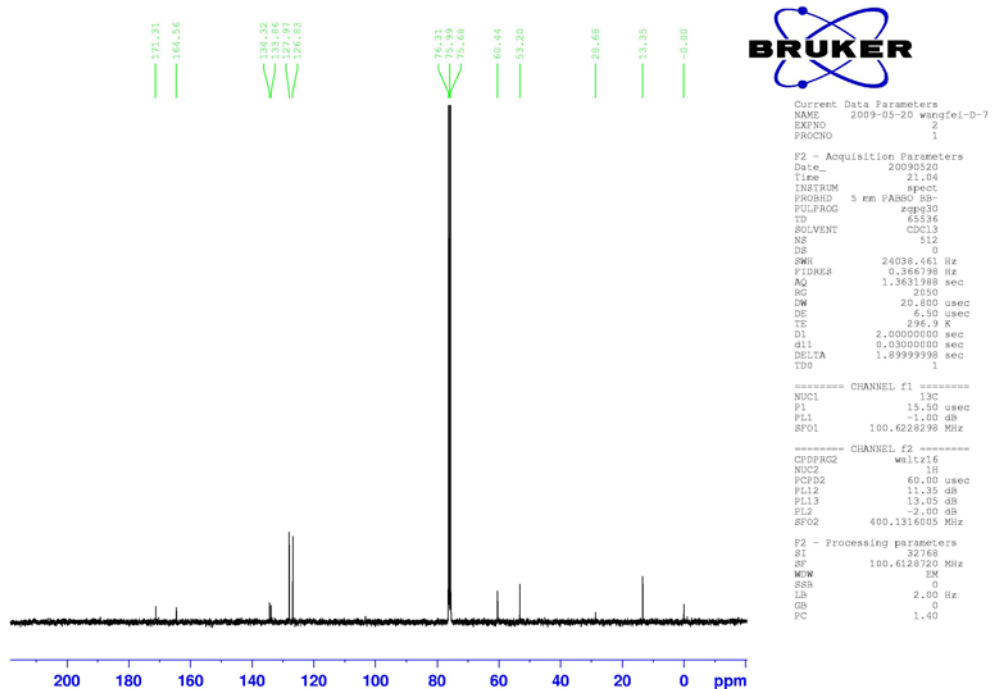

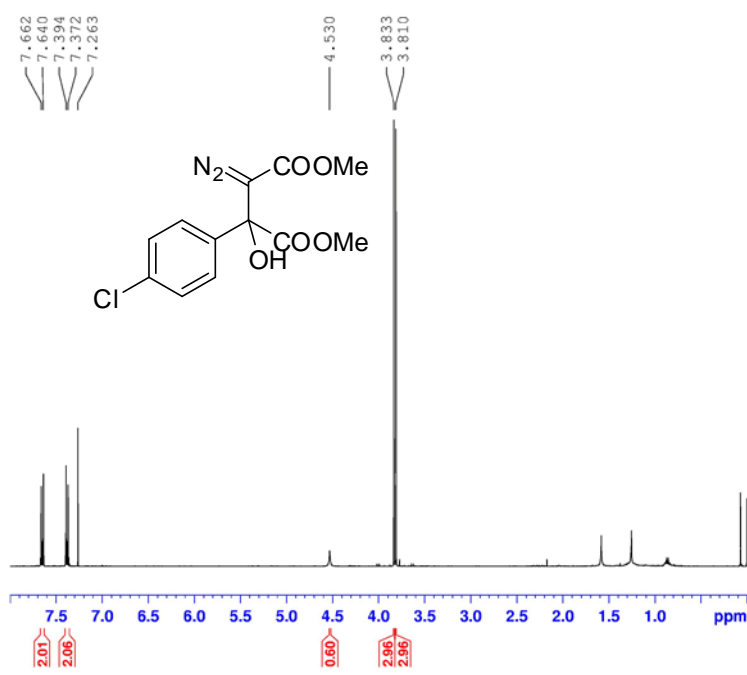

Current Data Parameters  
 NAME 2009-05-20 wangfei-0-7  
 EXNO 1  
 PROCNO 1  
 F2 - Acquisition Parameters  
 Date\_ 20090520  
 Time 21.12  
 INSTRUM spect  
 PROBHD 5 mm PABBO BB-  
 PULPROG zg30  
 TD 65536  
 SOLVENT CDCl3  
 NS 16  
 DS 0  
 SWS 8223.685 Hz  
 FIDRES 0.123483 Hz  
 AQ 3.9846387 sec  
 RG 96.5  
 SW 60.800 usec  
 DE 6.50 usec  
 TE 296.1 K  
 D1 1.0000000 sec  
 TDS 1

----- CHANNEL f1 -----  
 NUC1 1H  
 P1 12.00 usec  
 PL1 -2.00 dB  
 SF01 400.1324710 MHz

F2 - Processing parameters  
 SI 32768  
 SF 400.1300082 MHz  
 MEW GM  
 SSB 0  
 LB -0.40 Hz  
 GB 0.3  
 PC 1.00

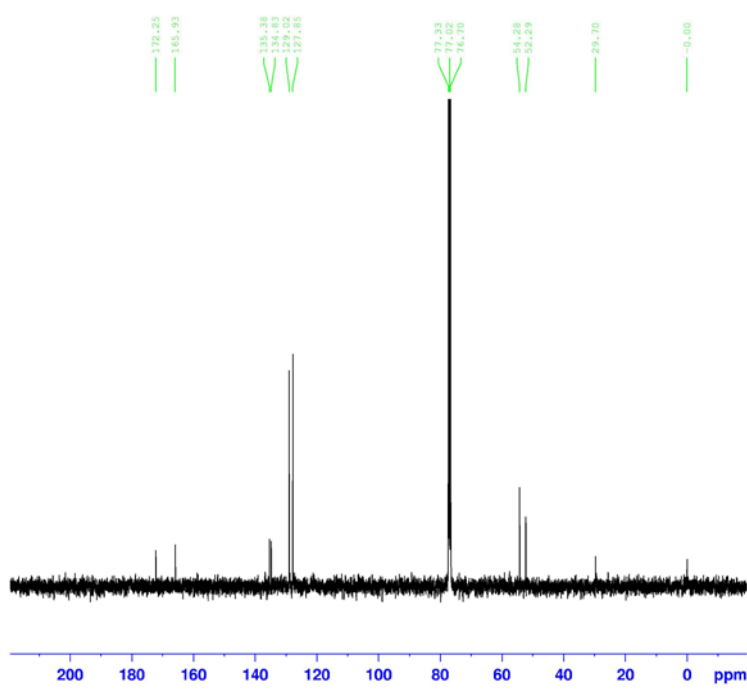

Current Data Parameters  
 NAME 2009-05-20 wangfei-0-7  
 EXNO 2  
 PROCNO 1  
 F2 - Acquisition Parameters  
 Date\_ 20090520  
 Time 21.41  
 INSTRUM spect  
 PROBHD 5 mm PABBO BB-  
 PULPROG zgpg30  
 TD 65536  
 SOLVENT CDCl3  
 NS 512  
 DS 0  
 SWS 24036.461 Hz  
 FIDRES 0.366798 Hz  
 AQ 1.3631988 sec  
 RG 2050  
 SW 20.800 usec  
 DE 6.50 usec  
 TE 296.1 K  
 D1 2.0000000 sec  
 d11 0.0300000 sec  
 DELTA 1.8999998 sec  
 TDS 1

----- CHANNEL f1 -----  
 NUC1 13C  
 P1 15.50 usec  
 PL1 -1.00 dB  
 SF01 100.6228298 MHz

----- CHANNEL f2 -----  
 CFDPG2 waltz16  
 NUC2 1H  
 PCPD2 60.00 usec  
 PL12 11.35 dB  
 PL13 13.05 dB  
 PL2 -2.00 dB  
 SF02 400.1316005 MHz

F2 - Processing parameters  
 SI 32768  
 SF 100.6127688 MHz  
 MEW EM  
 SSB 0  
 LB 2.00 Hz  
 GB 0  
 PC 1.40

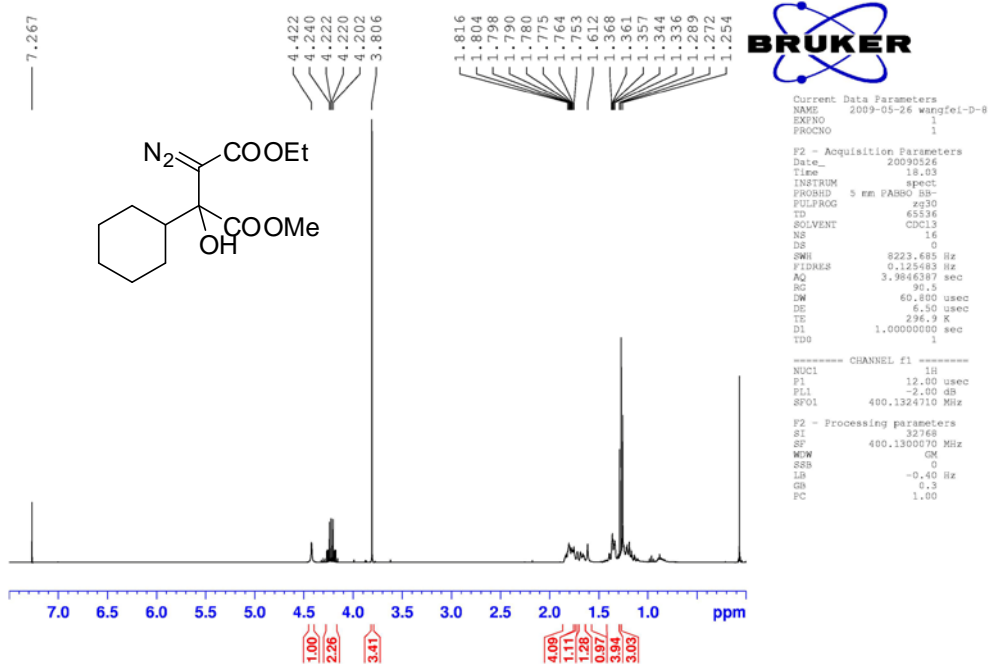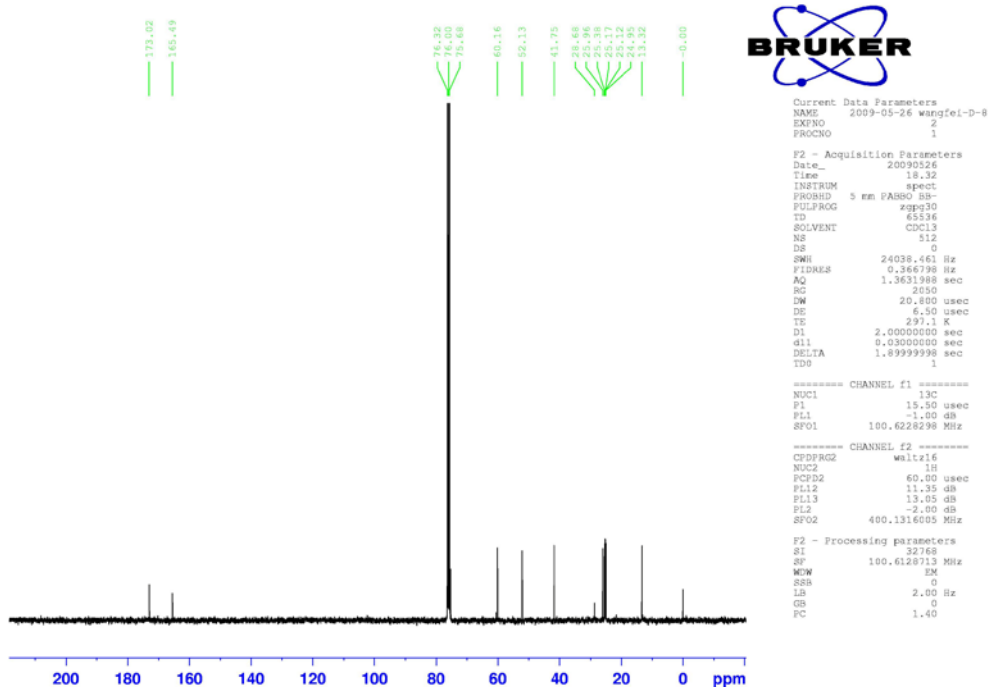

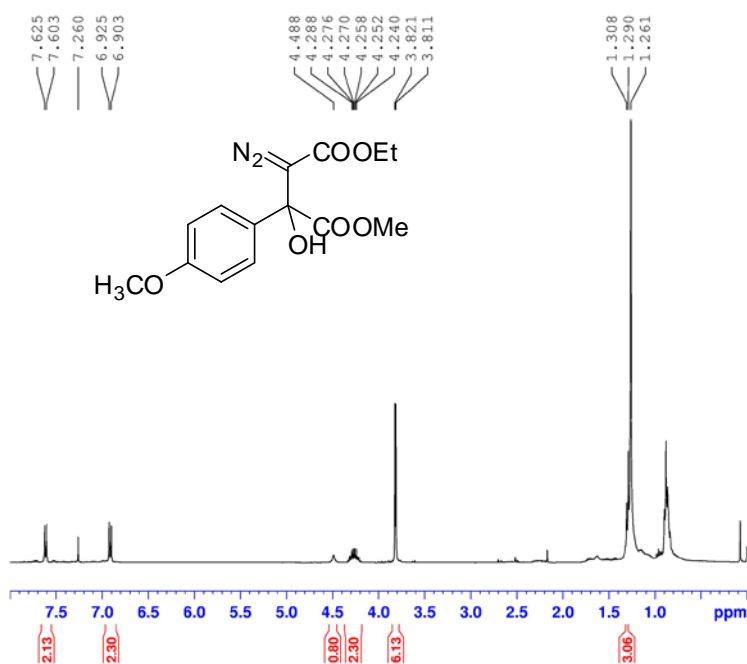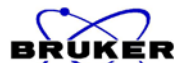

Current Data Parameters  
 NAME 2009-06-13 wangf  
 EXPNO 1  
 PROCNO 1

F2 - Acquisition Parameters  
 Date\_ 20090613  
 Time 17.27  
 INSTRUM spect  
 PROBHD 5 mm PABBO BB-  
 PULPROG zg30  
 TD 65536  
 SOLVENT CDC13  
 NS 16  
 DS 0  
 SWH 8223.685 Hz  
 FIDRES 0.125483 Hz  
 AQ 3.9846387 sec  
 RG 128  
 DW 60.800 usec  
 DE 6.50 usec  
 TE 296.4 K  
 D1 1.00000000 sec  
 TD0 1

===== CHANNEL f1 =====  
 NUC1 1H  
 P1 12.00 usec  
 PL1 -2.00 dB  
 SFO1 400.1324710 MHz

F2 - Processing parameters  
 SI 32768  
 SF 400.1300094 MHz  
 WDW EM  
 SSB 0  
 LB 0.30 Hz  
 GB 0  
 PC 1.00

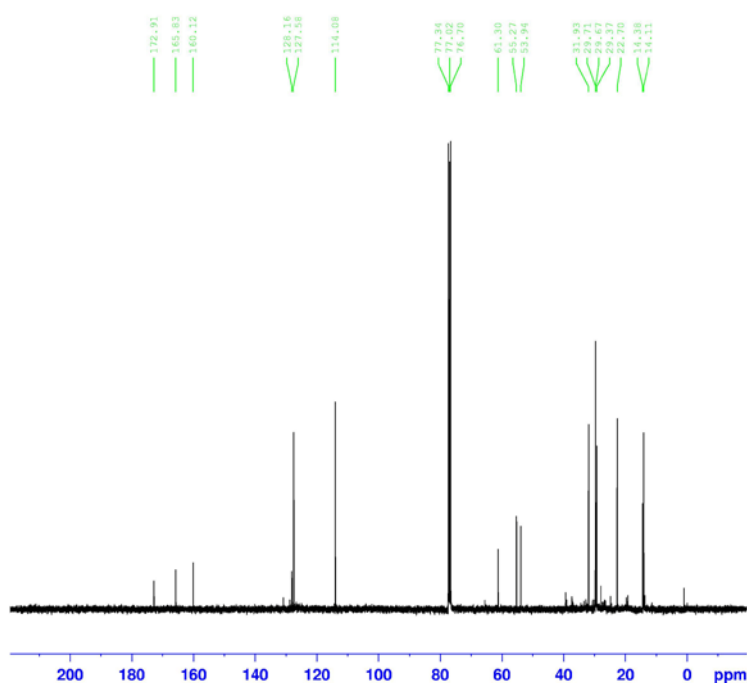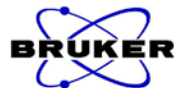

Current Data Parameters  
 NAME 2009-06-13 wangf-0-10  
 EXPNO 2  
 PROCNO 1

F2 - Acquisition Parameters  
 Date\_ 20090613  
 Time 17.57  
 INSTRUM spect  
 PROBHD 5 mm PABBO BB-  
 PULPROG zgpg30  
 TD 65536  
 SOLVENT CDC13  
 NS 512  
 DS 0  
 SWH 24038.461 Hz  
 FIDRES 0.366798 Hz  
 AQ 1.3631988 sec  
 RG 2050  
 DW 20.600 usec  
 DE 6.50 usec  
 TE 297.5 K  
 D1 2.00000000 sec  
 d11 0.03000000 sec  
 DELTA 1.89999998 sec  
 TD0 1

===== CHANNEL f1 =====  
 NUC1 13C  
 P1 15.50 usec  
 PL1 -1.00 dB  
 SFO1 100.6228298 MHz

===== CHANNEL f2 =====  
 CPOPRG2 waltz16  
 NUC2 1H  
 PCPD2 60.00 usec  
 PL12 11.35 dB  
 PL13 13.05 dB  
 PL2 -2.00 dB  
 SFG2 400.1316005 MHz

F2 - Processing parameters  
 SI 32768  
 SF 100.6127690 MHz  
 MEW EM  
 SSB 0  
 LB 1.00 Hz  
 GB 0  
 PC 1.40

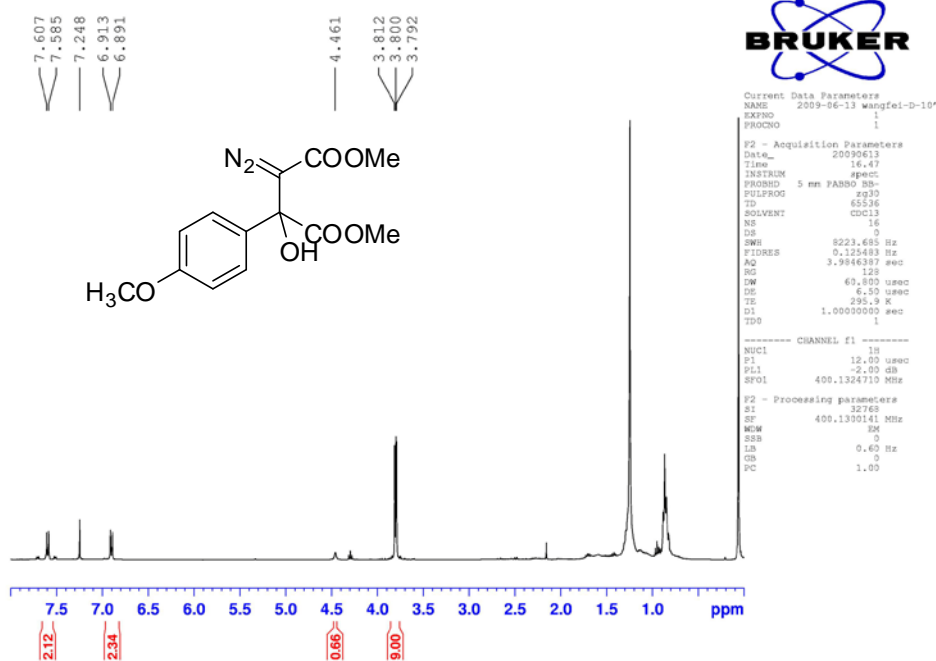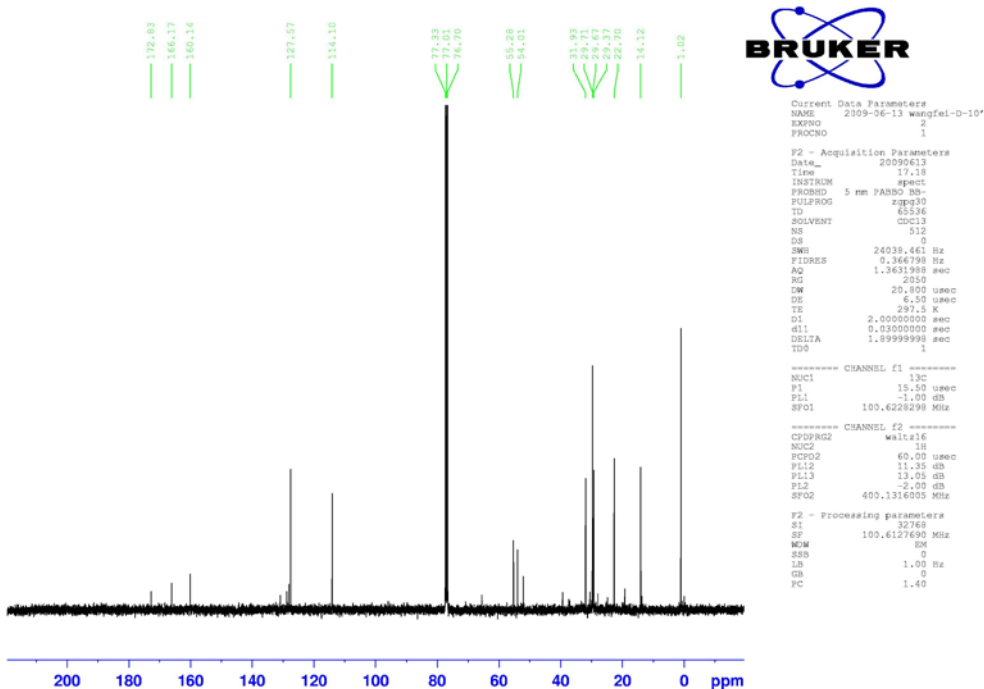

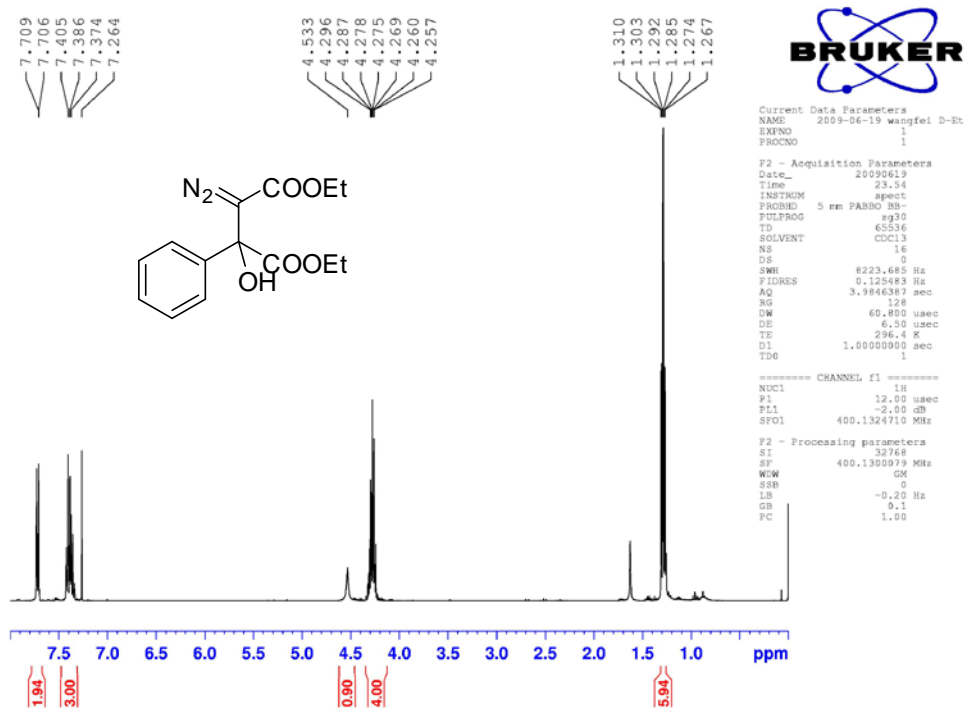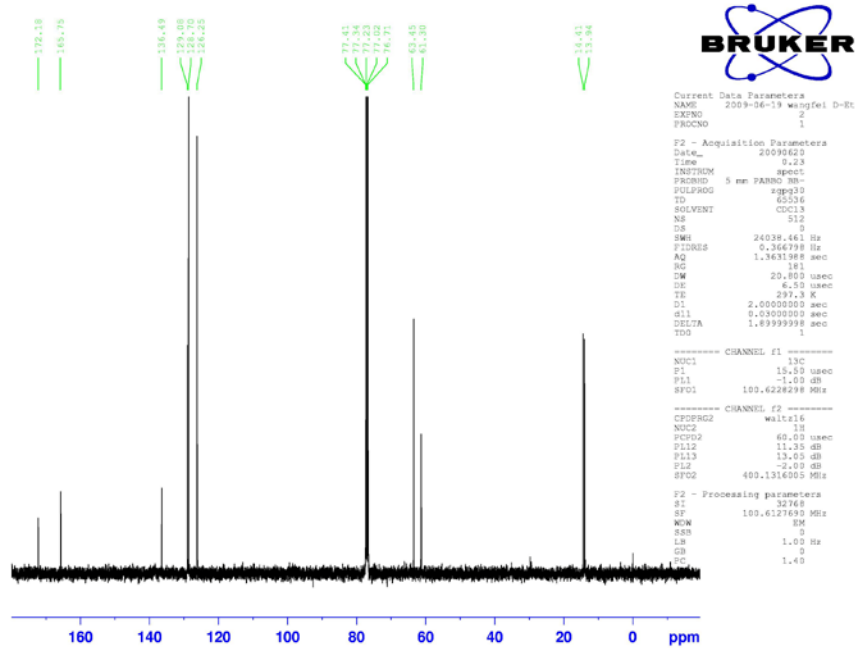



## 6. References

1. M. Rambaud, M. Balasse, G. Duguay and J. Villieras, *Synthesis* **1998**, 564.
2. J. S. Nimitz and H. S. Mosher, *J. Org. Chem.* **1981**, *46*, 211.
3. Z. Yu, X. Liu, Z. Dong, M. Xie and X. Feng, *Angew. Chem. Int. Ed.* **2008**, *47*, 1308.
4. H. Moorlag, R. Kellog, *Tetrahedron: Asymmetry*, **1991**, *2*, 705.
